# Supplementary material for: Revelation of molecular basis for chromium toxicity by phenotypes of Saccharomyces cerevisiae gene deletion mutants
Source: Royal Society of Chemistry journal article supplement (doi:10.1039/c6mt00039h), 2016-01-01
Supplement: c6mt00039h1.xlsx [file c6mt00039h1.xlsx]

## Sheet: Sheet1
ORF	H2O		Cr 0.05 mM		Cr 0.1 mM
	T0	T16	T0	T16	T0	T16
BY4743 Average (n=128)	0.0418889	0.900905	0.0417222	0.799802	0.0417778	0.511198
YAL002W	0.039	0.692	0.043	0.11	0.043	0.097
YAL004W	0.041	0.96	0.047	0.858	0.045	0.48
YAL005C	0.04	0.921	0.049	0.866	0.042	0.33
YAL007C	0.042	1.047	0.046	0.831	0.045	0.456
YAL008W	0.042	1.006	0.044	0.724	0.046	0.444
YAL009W	0.041	0.741	0.044	0.55	0.047	0.153
YAL010C	0.04	0.092	0.043	0.091	0.047	0.161
YAL011W	0.043	0.97	0.042	0.443	0.049	0.44
YAL012W	0.05	0.33	0.048	0.265	0.043	0.104
YAL013W	0.042	0.565	0.047	0.58	0.047	0.243
YAL014C	0.042	0.993	0.047	0.75	0.046	0.301
YAL015C	0.046	0.871	0.05	0.78	0.05	0.384
YAL016c-B	0.039	0.045	0.042	0.052	0.039	0.051
YAL016W	0.042	0.043	0.04	0.04	0.039	0.039
YAL017W	0.048	1.002	0.065	0.89	0.048	0.375
YAL018C	0.044	1.007	0.06	0.9	0.051	0.57
YAL019W	0.043	0.825	0.058	0.843	0.05	0.392
YAL020C	0.045	0.764	0.053	0.689	0.052	0.259
YAL021C	0.0485	0.5045	0.0465	0.149	0.0455	0.148
YAL022C	0.045	1.01	0.05	0.716	0.053	0.522
YAL023C	0.053	0.893	0.051	0.528	0.06	0.299
YAL024C	0.042	0.612	0.04	0.174	0.046	0.192
YAL026C	0.039	0.809	0.044	0.322	0.042	0.166
YAL027W	0.047	1.043	0.046	0.964	0.044	0.483
YAL028W	0.053	1.037	0.048	0.97	0.052	0.816
YAL029C	0.04	0.942	0.052	0.904	0.041	0.541
YAL030W	0.037	0.911	0.056	0.934	0.045	0.561
YAL031C	0.045	1.058	0.049	0.837	0.045	0.828
YAL034C	0.038	0.995	0.043	0.76	0.045	0.443
YAL035W	0.038	0.094	0.046	0.072	0.042	0.08
YAL036C	0.042	1.009	0.049	0.873	0.047	0.484
YAL037c-A	0.039	0.042	0.035	0.04	0.036	0.04
YAL037W	0.04	1.026	0.048	0.882	0.046	0.455
YAL039C	0.044	0.905	0.056	0.628	0.045	0.316
YAL040C	0.042	0.973	0.049	0.624	0.043	0.189
YAL042W	0.048	1.067	0.043	0.66	0.052	0.707
YAL043C-a	0.042	0.983	0.047	0.868	0.052	0.699
YAL044C	0.044	0.991	0.045	0.694	0.058	0.802
YAL044w-A	0.047	0.915	0.036	0.565	0.039	0.199
YAL045C	0.042	1.029	0.047	0.816	0.049	0.477
YAL046C	0.047	1.042	0.047	0.831	0.053	0.447
YAL047C	0.044	0.165	0.047	0.128	0.045	0.087
YAL048C	0.045	1.022	0.047	0.943	0.047	0.49
YAL049C	0.0405	0.938	0.043	0.7785	0.042	0.328
YAL051W	0.04	1.047	0.047	0.89	0.044	0.363
YAL053W	0.041	1.047	0.047	0.888	0.043	0.44
YAL054C	0.046	0.909	0.056	0.922	0.047	0.452
YAL055W	0.041	0.99	0.045	0.689	0.044	0.403
YAL056W	0.043	0.951	0.043	0.635	0.047	0.491
YAL058C-A	0.043	0.868	0.05	0.919	0.046	0.535
YAL058W	0.045	1.053	0.043	0.595	0.049	0.556
YAL059W	0.041	0.905	0.048	0.759	0.047	0.399
YAL060W	0.039	1.037	0.046	0.85	0.043	0.58
YAL061W	0.041	1.057	0.049	0.862	0.046	0.54
YAL062W	0.042	1.04	0.046	0.857	0.046	0.533
YAL064C-A	0.042	0.893	0.041	0.518	0.043	0.317
YAL065C	0.041	1.034	0.047	0.852	0.046	0.469
YAL066W	0.042	1.026	0.049	0.803	0.047	0.596
YAL067C	0.045	1.031	0.049	0.786	0.056	0.674
YAL067w-A	0.042	0.87	0.043	0.856	0.04	0.199
YAL068C	0.048	1.036	0.049	0.65	0.057	0.847
YAR002C-A	0.043	0.765	0.041	0.807	0.045	0.552
YAR002W	0.039	0.73	0.042	0.613	0.043	0.203
YAR003W	0.038	0.755	0.045	0.54	0.044	0.158
YAR014C	0.037	0.746	0.04	0.679	0.048	0.319
YAR015W	0.038	0.906	0.039	0.735	0.047	0.611
YAR018C	0.041	0.912	0.05	0.773	0.044	0.279
YAR020C	0.039	0.992	0.04	0.859	0.046	0.354
YAR023C	0.041	0.985	0.039	0.802	0.049	0.488
YAR027W	0.04	0.875	0.04	0.808	0.046	0.378
YAR028W	0.037	0.887	0.045	0.814	0.045	0.348
YAR029W	0.043	1.06	0.05	0.848	0.053	0.593
YAR030C	0.041	0.996	0.048	0.756	0.051	0.471
YAR031W	0.041	1.053	0.047	0.762	0.049	0.602
YAR035c-A	0.041	0.867	0.046	0.817	0.038	0.222
YAR035W	0.04	1.015	0.053	0.823	0.054	0.607
YAR037W	0.041	1.016	0.055	0.857	0.05	0.533
YAR040C	0.045	1.079	0.055	0.846	0.048	0.486
YAR042W	0.041	0.9575	0.049	0.8435	0.045	0.29
YAR043C	0.041	1.065	0.054	0.817	0.06	0.614
YAR044W	0.042	1.015	0.05	0.896	0.047	0.443
YAR047C	0.041	1.031	0.05	0.844	0.049	0.375
YAR050W	0.047	0.93	0.047	0.918	0.044	0.564
YBL001C	0.046	0.859	0.053	0.845	0.047	0.37
YBL002W	0.042	0.814	0.049	0.878	0.046	0.305
YBL003C	0.042	0.808	0.049	0.828	0.045	0.305
YBL005W	0.042	0.839	0.048	0.843	0.046	0.287
YBL006C	0.044	0.271	0.048	0.236	0.047	0.081
YBL007C	0.046	0.106	0.045	0.082	0.044	0.053
YBL008W	0.047	0.837	0.05	0.648	0.046	0.183
YBL008w-A	0.04	0.844	0.048	0.933	0.038	0.278
YBL009W	0.048	0.863	0.049	0.776	0.046	0.218
YBL010C	0.048	0.919	0.048	0.75	0.047	0.194
YBL011W	0.044	0.77	0.044	0.664	0.045	0.271
YBL012C	0.04	0.721	0.043	0.65	0.043	0.239
YBL013W	0.04	0.739	0.041	0.578	0.04	0.121
YBL015W	0.04	0.762	0.042	0.595	0.044	0.137
YBL017C	0.039	0.737	0.045	0.624	0.044	0.114
YBL019W	0.039	0.721	0.043	0.59	0.042	0.114
YBL021C	0.039	0.712	0.043	0.519	0.046	0.088
YBL022C	0.045	0.695	0.046	0.419	0.046	0.137
YBL024W	0.04	0.43	0.044	0.498	0.046	0.068
YBL027W	0.04	0.098	0.046	0.171	0.045	0.109
YBL028C	0.042	0.786	0.046	0.7	0.046	0.193
YBL029c-A	0.039	0.849	0.052	0.921	0.037	0.269
YBL029W	0.047	0.808	0.047	0.804	0.047	0.173
YBL031W	0.044	0.491	0.046	0.317	0.043	0.09
YBL032W	0.041	0.548	0.044	0.386	0.043	0.077
YBL033C	0.04	0.041	0.044	0.042	0.051	0.05
YBL036C	0.04	0.79	0.042	0.785	0.042	0.248
YBL037W	0.04	0.659	0.041	0.487	0.039	0.124
YBL038W	0.039	0.055	0.04	0.075	0.044	0.072
YBL039C	0.04	0.217	0.041	0.216	0.042	0.095
YBL039w-A	0.041	0.84	0.043	0.887	0.039	0.246
YBL042C	0.04	0.567	0.042	0.332	0.041	0.067
YBL043W	0.04	0.629	0.042	0.433	0.041	0.109
YBL044W	0.04	0.668	0.043	0.576	0.042	0.103
YBL045C	0.039	0.219	0.04	0.175	0.043	0.14
YBL046W	0.04	0.578	0.044	0.381	0.042	0.104
YBL047C	0.054	0.688	0.054	0.84	0.053	0.242
YBL048W	0.05	0.806	0.053	0.816	0.053	0.198
YBL049W	0.048	0.611	0.049	0.601	0.049	0.154
YBL051C	0.048	0.149	0.05	0.262	0.053	0.144
YBL052C	0.049	0.812	0.053	0.714	0.052	0.26
YBL053W	0.047	0.8	0.056	0.73	0.051	0.229
YBL054W	0.047	0.642	0.056	0.679	0.049	0.126
YBL055C	0.047	0.62	0.051	0.483	0.05	0.145
YBL056W	0.046	0.413	0.048	0.463	0.049	0.132
YBL057C	0.046	0.596	0.047	0.485	0.048	0.101
YBL058W	0.044	0.067	0.047	0.077	0.048	0.055
YBL059W	0.044	0.793	0.046	0.831	0.046	0.286
YBL060W	0.044	0.697	0.044	0.747	0.045	0.182
YBL061C	0.042	0.658	0.044	0.504	0.043	0.104
YBL062W	0.042	0.597	0.043	0.385	0.043	0.077
YBL063W	0.043	0.754	0.044	0.519	0.048	0.15
YBL064C	0.043	0.734	0.044	0.577	0.045	0.131
YBL065W	0.042	0.699	0.047	0.688	0.046	0.153
YBL066C	0.043	0.744	0.048	0.577	0.045	0.125
YBL067C	0.043	0.322	0.045	0.303	0.045	0.17
YBL068W	0.044	0.823	0.045	0.595	0.046	0.175
YBL069W	0.041	0.733	0.044	0.592	0.043	0.133
YBL070C	0.042	0.781	0.046	0.633	0.045	0.154
YBL071C	0.04	0.55	0.042	0.455	0.043	0.085
YBL071c-B	0.042	0.876	0.042	0.918	0.039	0.346
YBL071w-A	0.039	0.828	0.04	0.829	0.038	0.207
YBL072C	0.04	0.328	0.044	0.245	0.045	0.166
YBL075C	0.042	0.777	0.042	0.593	0.044	0.139
YBL078C	0.039	0.663	0.043	0.581	0.043	0.101
YBL079W	0.039	0.233	0.042	0.216	0.042	0.076
YBL080C	0.04	0.235	0.042	0.224	0.041	0.055
YBL081W	0.039	0.475	0.042	0.483	0.041	0.059
YBL082C	0.04	0.72	0.044	0.569	0.042	0.118
YBL083C	0.045	0.669	0.047	0.632	0.047	0.149
YBL085W	0.043	0.834	0.042	0.709	0.043	0.172
YBL086C	0.042	0.791	0.043	0.66	0.044	0.102
YBL087C	0.043	0.572	0.043	0.461	0.045	0.126
YBL088C	0.043	0.829	0.047	0.715	0.044	0.115
YBL089W	0.043	0.375	0.054	0.56	0.045	0.137
YBL090W	0.043	0.205	0.044	0.239	0.044	0.091
YBL091C	0.044	0.84	0.044	0.636	0.044	0.145
YBL091C-A	0.0415	0.9085	0.0415	0.646	0.04	0.2955
YBL093C	0.044	0.048	0.043	0.05	0.042	0.043
YBL094C	0.04	0.792	0.044	0.722	0.043	0.164
YBL095W	0.043	0.879	0.052	0.942	0.048	0.744
YBL096C	0.041	0.885	0.05	0.932	0.047	0.74
YBL098W	0.044	0.883	0.05	0.957	0.049	0.788
YBL099W	0.046	0.729	0.047	0.734	0.045	0.435
YBL100C	0.045	0.736	0.047	0.699	0.045	0.441
YBL101C	0.049	0.936	0.049	0.945	0.047	0.815
YBL101w-C	0.041	0.092	0.035	0.039	0.036	0.04
YBL102W	0.05	0.885	0.046	0.826	0.05	0.67
YBL104C	0.0455	0.918	0.044	0.8195	0.0465	0.522
YBL106C	0.039	0.869	0.046	0.907	0.044	0.634
YBL107C	0.039	0.835	0.044	0.89	0.045	0.641
YBR001C	0.039	0.836	0.044	0.857	0.043	0.541
YBR003W	0.04	0.682	0.043	0.704	0.042	0.4
YBR005W	0.04	0.892	0.044	0.875	0.046	0.738
YBR006W	0.039	0.838	0.044	0.776	0.046	0.576
YBR007C	0.039	0.846	0.045	0.858	0.046	0.734
YBR008C	0.043	0.874	0.047	0.896	0.049	0.762
YBR009C	0.04	0.777	0.05	0.751	0.049	0.562
YBR010W	0.043	0.871	0.048	0.868	0.047	0.761
YBR012C	0.041	0.843	0.047	0.915	0.049	0.714
YBR013C	0.042	0.885	0.047	0.895	0.045	0.82
YBR014C	0.042	0.89	0.049	0.934	0.046	0.772
YBR015C	0.042	0.816	0.046	0.787	0.044	0.713
YBR016W	0.041	0.848	0.047	0.88	0.05	0.806
YBR018C	0.044	0.846	0.047	0.896	0.05	0.785
YBR019C	0.048	0.852	0.052	0.906	0.052	0.781
YBR020W	0.0445	0.839	0.0475	0.875	0.043	0.4895
YBR022W	0.038	0.85	0.044	0.841	0.044	0.787
YBR023C	0.038	0.866	0.043	0.839	0.044	0.552
YBR024W	0.04	0.874	0.044	0.924	0.045	0.735
YBR025C	0.041	0.78	0.044	0.761	0.043	0.647
YBR026C	0.04	0.854	0.046	0.879	0.048	0.767
YBR027C	0.039	0.825	0.043	0.751	0.047	0.545
YBR028C	0.038	0.761	0.043	0.806	0.043	0.665
YBR030w	0.039	0.731	0.043	0.853	0.046	0.716
YBR031W	0.039	0.484	0.046	0.721	0.046	0.591
YBR032W	0.051	0.878	0.056	0.892	0.055	0.801
YBR033W	0.05	0.883	0.052	0.863	0.053	0.652
YBR034C	0.046	0.725	0.054	0.769	0.053	0.686
YBR035C	0.045	0.071	0.049	0.084	0.051	0.084
YBR036C	0.045	0.596	0.051	0.737	0.05	0.43
YBR037C	0.047	0.649	0.05	0.669	0.049	0.368
YBR038W	0.051	0.842	0.053	0.809	0.054	0.667
YBR040W	0.045	0.86	0.051	0.83	0.05	0.609
YBR041W	0.045	0.642	0.05	0.681	0.051	0.482
YBR042C	0.047	0.651	0.05	0.742	0.056	0.598
YBR043C	0.047	0.806	0.053	0.888	0.058	0.756
YBR044C	0.042	0.854	0.046	0.876	0.047	0.794
YBR045C	0.04	0.91	0.047	0.84	0.048	0.809
YBR046C	0.041	0.854	0.046	0.854	0.048	0.706
YBR047W	0.04	0.836	0.046	0.84	0.046	0.528
YBR048W	0.04	0.579	0.046	0.651	0.046	0.468
YBR050C	0.042	0.841	0.047	0.862	0.048	0.705
YBR051W	0.042	0.874	0.046	0.844	0.044	0.61
YBR052C	0.04	0.861	0.045	0.782	0.046	0.592
YBR053C	0.041	0.736	0.047	0.819	0.048	0.705
YBR054W	0.04	0.842	0.047	0.875	0.05	0.808
YBR056W	0.041	0.92	0.047	0.87	0.046	0.751
YBR056w-A	0.039	0.726	0.041	0.797	0.038	0.209
YBR057C	0.042	0.913	0.045	0.83	0.048	0.76
YBR058C	0.041	0.868	0.044	0.87	0.047	0.678
YBR058c-A	0.036	0.042	0.039	0.044	0.036	0.041
YBR059C	0.043	0.847	0.044	0.843	0.046	0.667
YBR062C	0.0435	0.8835	0.043	0.777	0.0445	0.4905
YBR063C	0.047	0.9	0.045	0.864	0.045	0.741
YBR064W	0.046	0.897	0.046	0.846	0.047	0.711
YBR065C	0.042	0.856	0.043	0.809	0.05	0.782
YBR066C	0.043	0.749	0.044	0.842	0.048	0.733
YBR067C	0.042	0.818	0.046	0.894	0.051	0.75
YBR068C	0.042	0.842	0.047	0.797	0.047	0.527
YBR069C	0.041	0.416	0.046	0.413	0.045	0.151
YBR071W	0.042	0.883	0.045	0.834	0.045	0.481
YBR072c-A	0.042	0.859	0.046	0.88	0.042	0.307
YBR072W	0.041	0.882	0.045	0.88	0.046	0.692
YBR073W	0.042	0.863	0.046	0.874	0.048	0.748
YBR074W	0.042	0.8985	0.046	0.7945	0.043	0.5695
YBR075W	0.0475	0.9155	0.044	0.877	0.045	0.4655
YBR076W	0.042	0.871	0.046	0.839	0.047	0.653
YBR077C	0.044	0.679	0.045	0.793	0.045	0.629
YBR078W	0.04	0.266	0.044	0.339	0.046	0.339
YBR083W	0.041	0.599	0.038	0.76	0.041	0.682
YBR084C-A	0.041	0.266	0.038	0.199	0.043	0.232
YBR084W	0.046	0.894	0.042	0.782	0.042	0.374
YBR085c-A	0.038	0.852	0.043	0.846	0.04	0.147
YBR090C	0.041	0.373	0.041	0.889	0.044	0.586
YBR090C-A	0.049	0.945	0.043	0.77	0.043	0.57
YBR092C	0.045	0.952	0.041	0.804	0.041	0.831
YBR093C	0.045	0.927	0.041	0.798	0.039	0.406
YBR094W	0.044	0.926	0.041	0.729	0.039	0.351
YBR098W	0.044	0.913	0.045	0.789	0.0385	0.3305
YBR099C	0.045	0.898	0.043	0.775	0.04	0.318
YBR100W	0.044	0.938	0.042	0.725	0.0435	0.6185
YBR101C	0.048	0.955	0.045	0.922	0.04	0.64
YBR103W	0.045	0.818	0.044	0.518	0.041	0.21
YBR104W	0.047	0.932	0.044	0.75	0.041	0.363
YBR105C	0.044	0.9085	0.0425	0.693	0.0415	0.308
YBR106W	0.041	0.143	0.041	0.098	0.038	0.107
YBR107C	0.043	0.898	0.043	0.842	0.041	0.576
YBR108W	0.045	0.921	0.045	0.881	0.042	0.414
YBR111w-A	0.038	0.778	0.041	0.774	0.04	0.127
YBR112C	0.037	0.043	0.037	0.042	0.053	0.075
YBR113W	0.046	0.904	0.046	0.883	0.042	0.678
YBR114W	0.043	0.86	0.044	0.752	0.04	0.39
YBR116C	0.041	0.851	0.039	0.762	0.038	0.296
YBR119W	0.043	0.705	0.042	0.66	0.048	0.368
YBR120C	0.048	0.956	0.044	0.917	0.04	0.775
YBR122C	0.044	0.844	0.043	0.815	0.043	0.328
YBR125C	0.04	0.678	0.037	0.291	0.038	0.321
YBR126C	0.064	0.211	0.053	0.115	0.047	0.127
YBR127C	0.051	0.058	0.051	0.053	0.047	0.052
YBR128C	0.05	0.673	0.051	0.376	0.048	0.23
YBR129C	0.051	0.945	0.054	0.809	0.049	0.562
YBR130C	0.054	0.933	0.056	0.934	0.049	0.695
YBR131W	0.044	0.558	0.038	0.364	0.043	0.434
YBR133c	0.048	0.8605	0.042	0.6265	0.043	0.243
YBR134W	0.045	0.765	0.05	0.578	0.047	0.183
YBR137W	0.056	0.892	0.046	0.81	0.044	0.584
YBR138C	0.045	0.896	0.044	0.775	0.041	0.656
YBR139W	0.051	0.954	0.046	0.882	0.044	0.859
YBR141C	0.045	0.931	0.044	0.752	0.04	0.596
YBR144C	0.044	0.936	0.05	0.93	0.042	0.814
YBR145W	0.045	0.928	0.041	0.887	0.042	0.771
YBR146W	0.045	0.933	0.047	0.917	0.04	0.776
YBR147W	0.043	0.92	0.042	0.903	0.039	0.715
YBR148W	0.043	0.872	0.044	0.838	0.039	0.691
YBR149W	0.041	0.86	0.042	0.805	0.04	0.66
YBR150C	0.044	0.868	0.047	0.825	0.043	0.646
YBR151W	0.049	0.96	0.048	0.931	0.044	0.792
YBR156C	0.043	0.809	0.044	0.738	0.039	0.536
YBR157C	0.044	0.951	0.0415	0.925	0.0395	0.752
YBR158W	0.041	0.917	0.044	0.899	0.038	0.75
YBR159W	0.043	0.905	0.039	0.894	0.037	0.739
YBR161W	0.037	0.916	0.044	0.907	0.039	0.714
YBR162C	0.049	0.894	0.048	0.779	0.042	0.642
YBR162W-A	0.047	0.962	0.047	0.906	0.041	0.794
YBR163W	0.041	0.383	0.041	0.191	0.039	0.107
YBR164C	0.048	0.512	0.049	0.452	0.04	0.243
YBR168W	0.039	0.149	0.038	0.081	0.041	0.081
YBR169C	0.041	0.692	0.038	0.732	0.04	0.743
YBR170C	0.045	0.919	0.042	0.879	0.04	0.767
YBR171W	0.044	0.189	0.042	0.188	0.04	0.093
YBR172C	0.04	0.87	0.045	0.873	0.043	0.712
YBR173C	0.048	0.507	0.047	0.262	0.046	0.232
YBR174C	0.045	0.617	0.043	0.455	0.046	0.393
YBR175W	0.045	0.594	0.044	0.334	0.046	0.347
YBR176W	0.05	0.919	0.043	0.832	0.044	0.741
YBR177C	0.045	0.945	0.041	0.851	0.044	0.841
YBR178W	0.046	0.953	0.043	0.87	0.044	0.751
YBR179C	0.049	0.616	0.044	0.387	0.042	0.433
YBR180W	0.047	0.942	0.044	0.877	0.043	0.684
YBR181C	0.044	0.548	0.042	0.333	0.041	0.256
YBR182C	0.042	0.914	0.042	0.832	0.042	0.571
YBR182c-A	0.039	0.861	0.042	0.768	0.04	0.125
YBR183W	0.046	0.91	0.045	0.855	0.043	0.519
YBR184W	0.05	0.949	0.051	0.96	0.042	0.708
YBR185C	0.046	0.95	0.043	0.94	0.043	0.877
YBR186W	0.047	0.957	0.043	0.921	0.042	0.854
YBR187W	0.042	0.896	0.039	0.852	0.039	0.799
YBR188C	0.043	0.932	0.04	0.86	0.041	0.792
YBR189W	0.049	0.187	0.051	0.168	0.045	0.166
YBR191W	0.05	0.344	0.044	0.325	0.043	0.362
YBR194W	0.041	0.15	0.038	0.15	0.038	0.184
YBR195C	0.042	0.86	0.04	0.724	0.039	0.579
YBR196c-A	0.038	0.726	0.043	0.793	0.039	0.226
YBR196c-B	0.038	0.879	0.043	0.935	0.042	0.216
YBR197C	0.047	0.92	0.043	0.868	0.044	0.793
YBR199W	0.043	0.941	0.042	0.831	0.044	0.848
YBR200W	0.041	0.05	0.039	0.054	0.042	0.054
YBR200w-A	0.038	0.837	0.04	0.848	0.042	0.225
YBR201W	0.0435	0.926	0.045	0.871	0.0415	0.6425
YBR203W	0.049	0.948	0.041	0.752	0.042	0.661
YBR204C	0.045	0.943	0.042	0.774	0.044	0.696
YBR205W	0.044	0.914	0.041	0.634	0.041	0.376
YBR206W	0.044	0.903	0.041	0.757	0.041	0.669
YBR207W	0.044	0.902	0.044	0.755	0.042	0.575
YBR208C	0.046	0.904	0.044	0.815	0.041	0.553
YBR210W	0.042	0.911	0.039	0.698	0.039	0.659
YBR212W	0.041	0.916	0.039	0.775	0.038	0.585
YBR213W	0.044	0.918	0.039	0.739	0.04	0.55
YBR214W	0.046	0.953	0.041	0.865	0.045	0.83
YBR215W	0.046	0.927	0.04	0.758	0.039	0.587
YBR216C	0.046	0.94	0.04	0.872	0.041	0.706
YBR217W	0.043	0.885	0.04	0.667	0.041	0.439
YBR218C	0.046	0.905	0.041	0.798	0.04	0.647
YBR219C	0.046	0.924	0.04	0.68	0.039	0.289
YBR220C	0.047	0.931	0.042	0.84	0.04	0.474
YBR221C	0.059	0.904	0.052	0.916	0.049	0.913
YBR221w-A	0.036	0.204	0.038	0.354	0.04	0.124
YBR222C	0.052	0.953	0.047	0.724	0.049	0.739
YBR223C	0.048	0.948	0.046	0.635	0.049	0.569
YBR224W	0.052	0.934	0.046	0.727	0.048	0.671
YBR225W	0.046	0.938	0.047	0.859	0.049	0.812
YBR226C	0.051	0.934	0.052	0.899	0.05	0.859
YBR227C	0.047	0.926	0.05	0.88	0.05	0.774
YBR228W	0.048	0.925	0.044	0.762	0.046	0.485
YBR229C	0.045	0.896	0.044	0.475	0.048	0.333
YBR230C	0.046	0.897	0.044	0.751	0.044	0.581
YBR230W-A	0.04	0.936	0.046	0.887	0.039	0.489
YBR231C	0.044	0.772	0.044	0.475	0.045	0.35
YBR232C	0.047	0.849	0.046	0.828	0.048	0.601
YBR233W	0.049	0.915	0.043	0.845	0.042	0.861
YBR235W	0.045	0.903	0.04	0.658	0.04	0.711
YBR238C	0.046	0.916	0.042	0.756	0.041	0.68
YBR239C	0.045	0.921	0.043	0.774	0.041	0.65
YBR240C	0.047	0.936	0.042	0.835	0.04	0.474
YBR241C	0.043	0.904	0.04	0.74	0.04	0.442
YBR242W	0.044	0.906	0.04	0.741	0.039	0.462
YBR244W	0.0395	0.8995	0.039	0.842	0.04	0.329
YBR245C	0.044	0.935	0.04	0.831	0.04	0.842
YBR246W	0.041	0.875	0.039	0.69	0.04	0.779
YBR248C	0.041	0.923	0.039	0.769	0.04	0.795
YBR249C	0.041	0.878	0.04	0.735	0.041	0.647
YBR250W	0.042	0.906	0.039	0.799	0.041	0.582
YBR251W	0.043	0.9	0.041	0.731	0.039	0.683
YBR255W	0.04	0.814	0.038	0.617	0.037	0.303
YBR258C	0.049	0.966	0.045	0.853	0.042	0.818
YBR259W	0.044	0.965	0.045	0.906	0.043	0.887
YBR260C	0.047	0.957	0.044	0.853	0.042	0.798
YBR261C	0.042	0.926	0.043	0.833	0.043	0.815
YBR262C	0.043	0.932	0.041	0.831	0.041	0.775
YBR263W	0.044	0.931	0.042	0.809	0.04	0.743
YBR264C	0.044	0.94	0.044	0.841	0.043	0.754
YBR266C	0.046	0.146	0.043	0.092	0.041	0.095
YBR267W	0.042	0.106	0.042	0.083	0.039	0.082
YBR268W	0.041	0.8	0.042	0.742	0.04	0.543
YBR269C	0.041	0.859	0.04	0.534	0.042	0.216
YBR270C	0.039	0.525	0.038	0.436	0.042	0.59
YBR271W	0.043	0.891	0.042	0.381	0.045	0.232
YBR272C	0.042	0.695	0.038	0.732	0.043	0.748
YBR273C	0.042	0.868	0.04	0.44	0.043	0.198
YBR274W	0.0405	0.868	0.039	0.616	0.0425	0.2265
YBR275C	0.045	0.672	0.037	0.714	0.041	0.779
YBR276C	0.045	0.621	0.039	0.623	0.048	0.784
YBR277C	0.042	0.828	0.041	0.344	0.041	0.191
YBR278W	0.042	0.869	0.04	0.361	0.04	0.239
YBR279W	0.039	0.046	0.039	0.039	0.041	0.04
YBR280C	0.044	0.506	0.038	0.689	0.046	0.765
YBR281C	0.047	0.915	0.041	0.509	0.042	0.308
YBR282W	0.042	0.184	0.04	0.101	0.042	0.081
YBR283C	0.045	0.788	0.041	0.411	0.048	0.317
YBR284W	0.048	0.957	0.041	0.778	0.048	0.361
YBR285W	0.0405	0.837	0.0415	0.64	0.044	0.219
YBR286W	0.048	0.915	0.042	0.639	0.045	0.268
YBR287W	0.044	0.677	0.039	0.646	0.042	0.757
YBR288C	0.044	0.273	0.041	0.299	0.048	0.379
YBR289W	0.04	0.051	0.04	0.056	0.042	0.078
YBR290W	0.048	0.965	0.041	0.516	0.044	0.518
YBR291C	0.044	0.873	0.041	0.341	0.042	0.212
YBR292C	0.045	0.908	0.043	0.624	0.044	0.324
YBR293W	0.045	0.907	0.04	0.679	0.045	0.43
YBR294W	0.047	0.576	0.04	0.375	0.049	0.745
YBR295W	0.053	0.926	0.042	0.759	0.045	0.451
YBR296C	0.045	0.911	0.042	0.79	0.044	0.313
YBR296c-A	0.037	0.819	0.043	0.794	0.043	0.18
YBR297W	0.045	0.879	0.042	0.65	0.043	0.274
YBR298C	0.044	0.816	0.042	0.509	0.045	0.188
YBR299W	0.042	0.841	0.04	0.787	0.044	0.702
YBR300C	0.044	0.884	0.048	0.469	0.045	0.233
YBR301W	0.042	0.41	0.041	0.454	0.043	0.38
YCL001W	0.058	0.924	0.048	0.885	0.044	0.548
YCL001W-A	0.044	0.858	0.04	0.286	0.041	0.184
YCL001w-B	0.039	0.828	0.043	0.769	0.044	0.179
YCL002C	0.0445	0.903	0.0455	0.8975	0.04	0.5795
YCL005W	0.052	0.853	0.044	0.749	0.042	0.343
YCL005W-A	0.039	0.051	0.04	0.043	0.041	0.044
YCL006C	0.0505	0.938	0.047	0.9385	0.0455	0.4405
YCL007C	0.046	0.096	0.046	0.048	0.043	0.047
YCL008C	0.05	0.868	0.05	0.189	0.043	0.164
YCL009C	0.051	0.957	0.05	0.939	0.043	0.599
YCL010C	0.046	0.827	0.044	0.711	0.04	0.319
YCL011C	0.05	0.883	0.046	0.785	0.042	0.338
YCL012C	0.047	0.899	0.042	0.822	0.039	0.592
YCL012W	0.053	0.95	0.046	0.925	0.042	0.581
YCL013W	0.05	0.909	0.043	0.776	0.047	0.546
YCL014W	0.0435	0.897	0.0415	0.754	0.0445	0.4135
YCL016C	0.041	0.179	0.04	0.108	0.042	0.067
YCL021w-A	0.046	0.931	0.039	0.64	0.038	0.313
YCL022C	0.05	0.916	0.051	0.912	0.046	0.606
YCL023C	0.0455	0.9195	0.0445	0.8775	0.046	0.4415
YCL024W	0.045	0.95	0.043	0.854	0.042	0.693
YCL025C	0.048	0.965	0.045	0.911	0.043	0.367
YCL026C	0.058	0.927	0.047	0.881	0.045	0.839
YCL026C-A	0.037	0.495	0.04	0.715	0.041	0.647
YCL026c-B	0.055	0.941	0.035	0.62	0.038	0.357
YCL027W	0.049	0.984	0.042	0.89	0.046	0.767
YCL028W	0.047	0.963	0.045	0.828	0.041	0.645
YCL029C	0.048	0.323	0.045	0.31	0.044	0.193
YCL030C	0.043	0.576	0.041	0.418	0.041	0.234
YCL032W	0.042	0.906	0.046	0.894	0.042	0.599
YCL033C	0.047	0.919	0.046	0.908	0.042	0.571
YCL034W	0.046	0.906	0.045	0.89	0.045	0.583
YCL035C	0.048	0.997	0.041	0.885	0.042	0.719
YCL036W	0.051	0.926	0.045	0.832	0.045	0.567
YCL037C	0.051	0.803	0.047	0.582	0.046	0.18
YCL038C	0.0475	0.9105	0.0445	0.8235	0.047	0.4755
YCL039W	0.044	0.956	0.042	0.912	0.044	0.799
YCL040W	0.043	0.922	0.041	0.817	0.041	0.453
YCL042W	0.044	0.897	0.041	0.838	0.04	0.454
YCL044C	0.047	0.924	0.047	0.929	0.045	0.743
YCL045C	0.043	0.916	0.042	0.78	0.04	0.639
YCL046W	0.04	0.103	0.041	0.116	0.04	0.114
YCL047C	0.044	0.959	0.042	0.814	0.04	0.562
YCL048W	0.042	0.807	0.04	0.398	0.041	0.31
YCL049C	0.043	0.889	0.043	0.67	0.039	0.289
YCL050C	0.062	0.921	0.055	0.857	0.049	0.804
YCL051W	0.054	0.778	0.051	0.726	0.054	0.4
YCL055W	0.056	0.872	0.048	0.676	0.052	0.419
YCL056C	0.058	0.91	0.05	0.82	0.049	0.55
YCL057c-A	0.037	0.76	0.042	0.393	0.045	0.167
YCL057W	0.053	0.964	0.05	0.897	0.05	0.603
YCL058C	0.052	0.385	0.053	0.39	0.044	0.263
YCL060C	0.052	0.852	0.046	0.405	0.048	0.383
YCL061C	0.0445	0.7765	0.0425	0.4655	0.0435	0.1885
YCL062W	0.051	0.889	0.043	0.794	0.044	0.68
YCL063W	0.046	0.818	0.042	0.67	0.043	0.352
YCL064C	0.042	0.895	0.041	0.773	0.04	0.373
YCL069W	0.042	0.902	0.041	0.688	0.04	0.316
YCL074W	0.048	0.935	0.05	0.927	0.042	0.694
YCL075W	0.043	0.95	0.051	0.907	0.043	0.692
YCL076W	0.043	0.934	0.047	0.894	0.042	0.492
YCR001W	0.045	0.955	0.042	0.88	0.041	0.816
YCR002C	0.04	0.318	0.04	0.293	0.04	0.117
YCR003W	0.038	0.12	0.037	0.117	0.039	0.102
YCR004C	0.045	0.945	0.04	0.884	0.04	0.693
YCR005C	0.042	0.913	0.04	0.78	0.038	0.542
YCR006C	0.044	0.915	0.039	0.803	0.04	0.571
YCR007C	0.042	0.91	0.042	0.822	0.039	0.53
YCR008W	0.044	0.905	0.041	0.839	0.039	0.623
YCR009C	0.039	0.172	0.038	0.097	0.038	0.052
YCR010C	0.041	0.925	0.038	0.681	0.038	0.568
YCR011C	0.043	0.904	0.04	0.578	0.038	0.699
YCR014C	0.045	0.941	0.044	0.907	0.044	0.713
YCR015C	0.046	0.95	0.043	0.931	0.042	0.655
YCR016W	0.048	0.928	0.044	0.886	0.04	0.662
YCR017C	0.045	0.87	0.042	0.817	0.04	0.289
YCR019W	0.047	0.89	0.042	0.865	0.041	0.418
YCR020C	0.05	0.913	0.043	0.838	0.041	0.574
YCR020C-A	0.043	0.863	0.042	0.793	0.04	0.361
YCR020W-B	0.039	0.126	0.039	0.067	0.039	0.057
YCR021C	0.043	0.933	0.04	0.807	0.04	0.477
YCR022C	0.045	0.907	0.041	0.753	0.04	0.447
YCR023C	0.049	0.943	0.046	0.881	0.041	0.497
YCR024C	0.049	0.451	0.041	0.359	0.0425	0.21
YCR024C-A	0.042	0.897	0.039	0.59	0.04	0.303
YCR025C	0.043	0.895	0.04	0.639	0.042	0.387
YCR026C	0.052	0.878	0.039	0.527	0.042	0.327
YCR027C	0.042	0.904	0.039	0.497	0.041	0.235
YCR028C	0.039	0.048	0.039	0.046	0.041	0.048
YCR028C-A	0.04	0.256	0.039	0.2	0.041	0.433
YCR030C	0.04	0.741	0.039	0.626	0.046	0.802
YCR031C	0.042	0.749	0.044	0.422	0.042	0.165
YCR032W	0.037	0.688	0.037	0.453	0.043	0.636
YCR033W	0.04	0.371	0.037	0.33	0.042	0.584
YCR034W	0.044	0.761	0.045	0.163	0.042	0.12
YCR036W	0.048	0.859	0.046	0.515	0.042	0.247
YCR037C	0.0465	0.8905	0.0435	0.663	0.0445	0.2765
YCR043C	0.055	0.937	0.046	0.596	0.045	0.269
YCR044C	0.041	0.101	0.046	0.051	0.045	0.048
YCR045C	0.046	0.843	0.046	0.379	0.046	0.161
YCR046C	0.04	0.37	0.037	0.151	0.045	0.323
YCR047C	0.04	0.051	0.038	0.043	0.047	0.063
YCR048W	0.038	0.582	0.037	0.705	0.042	0.772
YCR049C	0.051	0.936	0.042	0.693	0.045	0.278
YCR050C	0.047	0.884	0.041	0.441	0.042	0.254
YCR051W	0.044	0.821	0.041	0.433	0.041	0.206
YCR053W	0.038	0.383	0.037	0.37	0.046	0.694
YCR059C	0.044	0.92	0.043	0.752	0.045	0.283
YCR060W	0.041	0.642	0.041	0.735	0.041	0.535
YCR061W	0.0423333	0.902	0.0393333	0.718	0.042	0.278333
YCR062W	0.039	0.426	0.036	0.644	0.04	0.552
YCR063W	0.045	0.497	0.059	0.243	0.045	0.121
YCR065W	0.042	0.794	0.039	0.269	0.039	0.129
YCR066W	0.043	0.715	0.04	0.142	0.042	0.085
YCR067C	0.038	0.731	0.035	0.321	0.042	0.46
YCR068W	0.046	0.856	0.041	0.583	0.042	0.217
YCR069W	0.04	0.743	0.035	0.386	0.043	0.61
YCR071C	0.039	0.1	0.039	0.069	0.04	0.054
YCR073C	0.047	0.926	0.042	0.653	0.055	0.872
YCR073W-A	0.042	0.884	0.041	0.616	0.042	0.18
YCR075C	0.039	0.675	0.036	0.579	0.047	0.76
YCR075w-A	0.039	0.824	0.037	0.746	0.037	0.124
YCR076C	0.043	0.918	0.044	0.66	0.04	0.203
YCR077C	0.046	0.347	0.042	0.129	0.041	0.07
YCR079W	0.046	0.929	0.042	0.833	0.043	0.252
YCR081W	0.041	0.807	0.043	0.328	0.042	0.137
YCR082W	0.044	0.956	0.043	0.858	0.044	0.395
YCR083W	0.04	0.481	0.036	0.41	0.039	0.627
YCR084C	0.034	0.079	0.035	0.05	0.036	0.092
YCR085W	0.047	0.931	0.042	0.692	0.043	0.249
YCR086W	0.04	0.529	0.04	0.119	0.04	0.06
YCR087C-A	0.043	0.828	0.04	0.331	0.041	0.084
YCR087W	0.04	0.762	0.039	0.263	0.039	0.068
YCR088W	0.042	0.42	0.037	0.547	0.04	0.588
YCR089W	0.04	0.362	0.036	0.352	0.044	0.584
YCR090C	0.05	0.946	0.044	0.837	0.043	0.243
YCR091W	0.046	0.914	0.04	0.565	0.041	0.225
YCR092C	0.049	0.937	0.045	0.689	0.048	0.312
YCR094W	0.042	0.199	0.04	0.099	0.042	0.121
YCR095C	0.048	0.857	0.049	0.858	0.048	0.576
YCR095W-A	0.041	0.898	0.039	0.835	0.044	0.326
YCR098C	0.045	0.823	0.041	0.359	0.042	0.147
YCR099C	0.047	0.956	0.042	0.694	0.043	0.234
YCR100C	0.047	0.906	0.04	0.633	0.042	0.219
YCR101C	0.045	0.881	0.04	0.645	0.041	0.255
YCR102C	0.048	0.877	0.04	0.683	0.043	0.274
YCR102W-A	0.047	0.864	0.053	0.83	0.044	0.411
YCR105W	0.047	0.935	0.04	0.687	0.041	0.233
YCR106W	0.043	0.933	0.04	0.698	0.04	0.243
YCR107W	0.043	0.872	0.038	0.774	0.043	0.707
YDL001W	0.043	0.793	0.04	0.571	0.042	0.397
YDL002C	0.044	0.829	0.041	0.538	0.043	0.312
YDL005C	0.0405	0.395	0.04	0.243	0.043	0.2095
YDL006W	0.043	0.42	0.041	0.254	0.042	0.143
YDL009C	0.043	0.813	0.04	0.544	0.04	0.335
YDL010W	0.043	0.822	0.044	0.674	0.042	0.381
YDL011C	0.043	0.811	0.041	0.578	0.042	0.396
YDL012C	0.041	0.769	0.045	0.651	0.042	0.526
YDL013W	0.042	0.077	0.041	0.059	0.042	0.052
YDL018C	0.043	0.782	0.039	0.395	0.043	0.254
YDL019C	0.0395	0.9045	0.0395	0.701	0.0415	0.4315
YDL020C	0.041	0.425	0.039	0.277	0.041	0.273
YDL021W	0.041	0.67	0.039	0.29	0.039	0.168
YDL022W	0.042	0.8	0.039	0.453	0.039	0.317
YDL023C	0.044	0.7	0.04	0.431	0.041	0.272
YDL024C	0.046	0.758	0.04	0.593	0.046	0.416
YDL025C	0.042	0.751	0.04	0.376	0.041	0.192
YDL026W	0.043	0.8565	0.04	0.5825	0.042	0.29
YDL027C	0.044	0.848	0.04	0.455	0.041	0.325
YDL032W	0.04	0.161	0.038	0.111	0.038	0.081
YDL033C	0.041	0.242	0.04	0.107	0.04	0.067
YDL034W	0.0385	0.788	0.041	0.6045	0.0415	0.2955
YDL035C	0.041	0.533	0.041	0.392	0.043	0.273
YDL036C	0.0433333	0.664	0.0403333	0.682667	0.0446667	0.343
YDL037C	0.039	0.7	0.04	0.416	0.04	0.214
YDL038C	0.039	0.808	0.0405	0.605	0.042	0.3515
YDL039C	0.0385	0.7655	0.04	0.5235	0.0415	0.2615
YDL040C	0.039	0.112	0.037	0.064	0.036	0.05
YDL041W	0.041	0.095	0.038	0.077	0.039	0.075
YDL042C	0.04	0.68	0.038	0.434	0.038	0.287
YDL044C	0.039	0.152	0.037	0.089	0.039	0.102
YDL045W-A	0.039	0.077	0.038	0.058	0.039	0.072
YDL046W	0.039	0.748	0.038	0.315	0.04	0.171
YDL047W	0.042	0.087	0.037	0.05	0.038	0.043
YDL048C	0.045	0.637	0.047	0.419	0.047	0.17
YDL049C	0.047	0.809	0.046	0.447	0.047	0.365
YDL050C	0.045	0.777	0.044	0.341	0.044	0.247
YDL051W	0.044	0.703	0.043	0.356	0.045	0.282
YDL052C	0.044	0.397	0.043	0.25	0.043	0.307
YDL053C	0.042	0.821	0.042	0.5715	0.041	0.337
YDL054C	0.043	0.698	0.044	0.344	0.044	0.229
YDL056W	0.047	0.117	0.044	0.085	0.044	0.099
YDL057W	0.042	0.704	0.041	0.343	0.042	0.203
YDL059C	0.044	0.697	0.045	0.219	0.043	0.089
YDL061C	0.039	0.571	0.041	0.3815	0.0395	0.1895
YDL062W	0.042	0.443	0.041	0.255	0.04	0.184
YDL063C	0.042	0.31	0.041	0.183	0.04	0.14
YDL065C	0.04	0.739	0.04	0.304	0.041	0.203
YDL066W	0.041	0.442	0.039	0.108	0.041	0.083
YDL067C	0.038	0.72	0.0395	0.3825	0.04	0.1455
YDL068W	0.04	0.185	0.039	0.079	0.041	0.071
YDL069C	0.041	0.41	0.041	0.233	0.0415	0.121
YDL070W	0.041	0.604	0.041	0.235	0.041	0.138
YDL071C	0.04	0.708	0.039	0.526	0.04	0.172
YDL072C	0.041	0.685	0.04	0.438	0.043	0.205
YDL073W	0.04	0.748	0.041	0.432	0.04	0.165
YDL074C	0.0385	0.105	0.039	0.087	0.038	0.0535
YDL075W	0.042	0.051	0.04	0.049	0.039	0.049
YDL076C	0.04	0.684	0.039	0.255	0.039	0.146
YDL077C	0.0395	0.566	0.0405	0.1355	0.0405	0.0945
YDL078C	0.041	0.757	0.041	0.485	0.04	0.212
YDL079C	0.039	0.69	0.04	0.368	0.04	0.176
YDL080C	0.039	0.56	0.038	0.203	0.04	0.12
YDL081C	0.04	0.119	0.039	0.064	0.041	0.061
YDL082W	0.04	0.282	0.039	0.155	0.04	0.123
YDL083C	0.042	0.393	0.039	0.181	0.041	0.135
YDL085c-A	0.038	0.877	0.041	0.803	0.038	0.146
YDL085W	0.041	0.73	0.04	0.368	0.043	0.163
YDL086W	0.044	0.718	0.04	0.328	0.04	0.174
YDL088C	0.042	0.688	0.04	0.331	0.039	0.178
YDL089W	0.044	0.765	0.041	0.322	0.04	0.149
YDL090C	0.041	0.175	0.041	0.103	0.04	0.077
YDL091C	0.041	0.757	0.043	0.408	0.041	0.27
YDL093W	0.041	0.725	0.039	0.296	0.04	0.173
YDL094C	0.041	0.709	0.041	0.413	0.042	0.215
YDL096C	0.046	0.817	0.042	0.606	0.045	0.528
YDL099W	0.044	0.89	0.042	0.671	0.042	0.248
YDL100C	0.044	0.738	0.041	0.556	0.042	0.123
YDL101C	0.04	0.386	0.039	0.325	0.042	0.093
YDL104C	0.043	0.788	0.041	0.626	0.043	0.195
YDL106C	0.042	0.111	0.043	0.148	0.042	0.072
YDL107W	0.043	0.585	0.04	0.466	0.042	0.147
YDL109C	0.039	0.76	0.039	0.598	0.04	0.216
YDL110C	0.041	0.674	0.038	0.566	0.039	0.163
YDL112W	0.04	0.763	0.039	0.733	0.039	0.197
YDL113C	0.041	0.848	0.04	0.727	0.041	0.366
YDL114W	0.04	0.839	0.039	0.713	0.042	0.231
YDL115C	0.04	0.06	0.039	0.052	0.04	0.049
YDL116W	0.041	0.063	0.04	0.077	0.041	0.054
YDL117W	0.043	0.092	0.042	0.105	0.042	0.078
YDL118W	0.04	0.8	0.04	0.631	0.04	0.342
YDL119C	0.042	0.476	0.04	0.325	0.043	0.164
YDL121C	0.042	0.905	0.041	0.669	0.042	0.339
YDL122W	0.041	0.858	0.04	0.642	0.042	0.309
YDL123W	0.041	0.893	0.042	0.738	0.045	0.32
YDL124W	0.04	0.812	0.039	0.797	0.04	0.306
YDL125C	0.04	0.833	0.042	0.748	0.041	0.273
YDL127W	0.04	0.783	0.038	0.738	0.04	0.233
YDL128W	0.04	0.87	0.042	0.767	0.042	0.275
YDL129W	0.04	0.82	0.038	0.787	0.042	0.243
YDL130W	0.04	0.307	0.04	0.397	0.041	0.16
YDL130W-A	0.042	0.89	0.04	0.663	0.043	0.267
YDL131W	0.042	0.801	0.04	0.684	0.043	0.244
YDL133C-A	0.048	0.851	0.052	0.794	0.047	0.263
YDL133W	0.037	0.615	0.037	0.424	0.038	0.109
YDL134C	0.04	0.752	0.039	0.734	0.041	0.208
YDL134C-A	0.041	0.873	0.039	0.762	0.039	0.288
YDL135C	0.039	0.796	0.039	0.712	0.039	0.252
YDL136W	0.039	0.351	0.039	0.443	0.039	0.19
YDL137W	0.04	0.875	0.041	0.782	0.043	0.316
YDL138W	0.039	0.826	0.038	0.788	0.039	0.298
YDL142C	0.039	0.826	0.039	0.724	0.042	0.288
YDL144C	0.044	0.906	0.043	0.754	0.046	0.406
YDL146W	0.045	0.735	0.045	0.706	0.048	0.232
YDL149W	0.049	0.872	0.044	0.723	0.047	0.317
YDL151C	0.044	0.093	0.046	0.092	0.044	0.06
YDL154W	0.044	0.828	0.043	0.609	0.047	0.278
YDL155W	0.043	0.822	0.043	0.774	0.043	0.47
YDL156W	0.04	0.656	0.041	0.707	0.042	0.259
YDL157C	0.04	0.627	0.041	0.764	0.041	0.271
YDL159w-A	0.038	0.846	0.042	0.85	0.038	0.187
YDL160C	0.039	0.138	0.039	0.239	0.039	0.1
YDL160c-A	0.036	0.764	0.041	0.837	0.037	0.155
YDL161W	0.04	0.801	0.041	0.795	0.042	0.283
YDL162C	0.04	0.618	0.041	0.572	0.041	0.156
YDL167C	0.045	0.852	0.041	0.769	0.042	0.495
YDL168W	0.04	0.851	0.043	0.642	0.042	0.316
YDL169C	0.04	0.723	0.038	0.605	0.042	0.258
YDL170W	0.04	0.846	0.039	0.702	0.044	0.347
YDL171C	0.04	0.801	0.036	0.701	0.04	0.299
YDL172C	0.038	0.755	0.037	0.635	0.039	0.257
YDL173W	0.04	0.813	0.04	0.666	0.04	0.299
YDL174C	0.04	0.798	0.039	0.709	0.04	0.338
YDL175C	0.041	0.77	0.04	0.602	0.042	0.23
YDL176W	0.04	0.827	0.04	0.696	0.042	0.283
YDL177C	0.04	0.825	0.039	0.625	0.041	0.326
YDL178W	0.041	0.863	0.044	0.759	0.044	0.339
YDL179W	0.044	0.867	0.044	0.672	0.045	0.499
YDL180W	0.04	0.811	0.04	0.659	0.042	0.281
YDL182W	0.041	0.778	0.039	0.584	0.041	0.285
YDL183C	0.041	0.664	0.041	0.514	0.041	0.15
YDL184C	0.041	0.799	0.041	0.669	0.04	0.286
YDL185W	0.04	0.061	0.039	0.049	0.041	0.044
YDL186W	0.042	0.778	0.041	0.6	0.043	0.247
YDL187C	0.042	0.786	0.042	0.587	0.041	0.284
YDL188C	0.043	0.736	0.04	0.531	0.041	0.231
YDL189W	0.044	0.73	0.042	0.532	0.041	0.245
YDL190C	0.041	0.764	0.042	0.653	0.042	0.301
YDL191W	0.046	0.242	0.043	0.272	0.052	0.098
YDL192W	0.041	0.703	0.042	0.365	0.047	0.361
YDL194W	0.046	0.428	0.044	0.366	0.044	0.191
YDL197C	0.043	0.9	0.041	0.72	0.05	0.641
YDL198C	0.045	0.161	0.041	0.199	0.048	0.165
YDL199C	0.044	0.901	0.041	0.731	0.049	0.659
YDL200C	0.044	0.915	0.043	0.796	0.051	0.502
YDL201W	0.046	0.908	0.041	0.732	0.049	0.431
YDL202W	0.051	0.629	0.044	0.481	0.051	0.405
YDL203C	0.042	0.98	0.042	0.922	0.045	0.628
YDL204W	0.041	0.978	0.04	0.902	0.047	0.615
YDL206W	0.041	0.937	0.041	0.845	0.043	0.481
YDL210W	0.042	0.931	0.04	0.753	0.047	0.585
YDL211C	0.041	0.895	0.04	0.667	0.046	0.542
YDL213C	0.047	0.834	0.041	0.612	0.046	0.488
YDL214C	0.048	0.951	0.044	0.84	0.051	0.513
YDL215C	0.057	0.962	0.043	0.914	0.049	0.823
YDL216C	0.047	0.973	0.042	0.808	0.044	0.647
YDL218W	0.045	0.901	0.041	0.669	0.046	0.575
YDL219W	0.042	0.9	0.039	0.682	0.043	0.553
YDL222C	0.047	0.906	0.044	0.73	0.05	0.735
YDL223C	0.045	0.867	0.041	0.631	0.05	0.718
YDL224C	0.051	0.912	0.044	0.596	0.049	0.784
YDL225W	0.046	0.825	0.042	0.412	0.045	0.629
YDL226C	0.05	0.813	0.043	0.463	0.046	0.541
YDL227C	0.041	0.936	0.037	0.774	0.045	0.776
YDL229W	0.038	0.898	0.037	0.629	0.042	0.522
YDL230W	0.04	0.919	0.037	0.697	0.044	0.542
YDL231C	0.04	0.901	0.036	0.694	0.042	0.593
YDL232W	0.041	0.885	0.037	0.641	0.043	0.672
YDL233W	0.04	0.865	0.039	0.843	0.044	0.717
YDL234C	0.046	0.943	0.039	0.704	0.049	0.834
YDL236W	0.04	0.808	0.039	0.417	0.044	0.573
YDL237W	0.041	0.866	0.041	0.505	0.046	0.766
YDL238C	0.043	0.816	0.039	0.441	0.044	0.689
YDL239C	0.048	0.896	0.04	0.576	0.046	0.688
YDL240W	0.058	0.98	0.051	0.656	0.055	0.724
YDL241W	0.048	0.934	0.05	0.635	0.054	0.641
YDL242W	0.048	0.943	0.045	0.592	0.047	0.562
YDL243C	0.047	0.914	0.047	0.614	0.05	0.577
YDR001C	0.047	0.883	0.045	0.603	0.051	0.663
YDR003W	0.054	0.891	0.049	0.765	0.057	0.733
YDR003w-A	0.037	0.156	0.042	0.187	0.038	0.102
YDR004W	0.049	0.599	0.043	0.211	0.053	0.269
YDR005C	0.05	0.81	0.044	0.511	0.052	0.619
YDR006C	0.051	0.89	0.043	0.511	0.051	0.583
YDR007W	0.043	0.771	0.043	0.4925	0.0435	0.494
YDR008C	0.055	0.943	0.048	0.636	0.054	0.731
YDR009W	0.045	0.921	0.041	0.768	0.047	0.722
YDR010C	0.05	0.946	0.04	0.732	0.046	0.656
YDR011W	0.045	0.922	0.04	0.633	0.044	0.529
YDR014W	0.044	0.86	0.039	0.547	0.045	0.584
YDR015C	0.044	0.877	0.041	0.646	0.049	0.753
YDR017C	0.045	0.077	0.038	0.058	0.042	0.084
YDR018C	0.046	0.873	0.04	0.707	0.049	0.694
YDR019C	0.049	0.902	0.042	0.678	0.048	0.735
YDR020C	0.05	0.889	0.041	0.58	0.048	0.775
YDR022C	0.045	0.919	0.039	0.773	0.041	0.579
YDR024W	0.045	0.412	0.038	0.384	0.044	0.279
YDR025W	0.045	0.288	0.039	0.299	0.043	0.253
YDR026C	0.04	0.83	0.039	0.687	0.042	0.615
YDR027C	0.04	0.29	0.038	0.1	0.044	0.113
YDR028C	0.044	0.469	0.041	0.288	0.048	0.349
YDR029W	0.046	0.915	0.042	0.865	0.048	0.771
YDR030C	0.048	0.905	0.041	0.782	0.049	0.74
YDR031W	0.046	0.916	0.042	0.732	0.049	0.738
YDR032C	0.049	0.93	0.044	0.739	0.05	0.81
YDR033W	0.051	0.936	0.044	0.769	0.05	0.76
YDR034C	0.043	0.961	0.042	0.923	0.048	0.691
YDR034w-B	0.036	0.669	0.038	0.763	0.037	0.134
YDR035W	0.044	0.965	0.04	0.803	0.045	0.663
YDR036C	0.045	0.97	0.039	0.721	0.044	0.605
YDR042C	0.042	0.924	0.041	0.896	0.047	0.662
YDR043C	0.042	0.9	0.039	0.777	0.046	0.746
YDR046C	0.043	0.925	0.039	0.583	0.046	0.68
YDR048C	0.043	0.573	0.04	0.168	0.047	0.312
YDR049W	0.048	0.614	0.057	0.396	0.044	0.101
YDR051C	0.042	0.729	0.051	0.818	0.042	0.134
YDR055W	0.04	0.788	0.048	0.762	0.042	0.207
YDR056C	0.041	0.805	0.046	0.656	0.042	0.198
YDR057W	0.039	0.463	0.051	0.511	0.04	0.13
YDR058C	0.048	0.884	0.045	0.616	0.049	0.206
YDR059C	0.043	0.803	0.048	0.692	0.046	0.216
YDR061W	0.043	0.87	0.057	0.671	0.044	0.227
YDR063W	0.043	0.841	0.046	0.954	0.04	0.164
YDR065W	0.043	0.349	0.047	0.685	0.039	0.121
YDR066C	0.044	0.755	0.045	0.999	0.04	0.241
YDR067C	0.046	0.923	0.042	0.925	0.044	0.521
YDR068W	0.044	0.84	0.042	0.54	0.041	0.284
YDR069C	0.04	0.532	0.038	0.181	0.038	0.056
YDR070C	0.044	0.686	0.046	0.879	0.04	0.199
YDR071C	0.045	0.878	0.043	0.842	0.042	0.743
YDR072C	0.045	0.727	0.053	0.546	0.04	0.096
YDR073W	0.043	0.779	0.048	0.537	0.042	0.196
YDR074W	0.043	0.307	0.041	0.261	0.04	0.18
YDR075W	0.044	0.765	0.062	0.848	0.043	0.323
YDR076W	0.039	0.286	0.052	0.212	0.042	0.09
YDR077W	0.041	0.79	0.051	0.911	0.043	0.212
YDR078C	0.039	0.788	0.056	0.756	0.039	0.245
YDR079c-A	0.037	0.662	0.039	0.769	0.038	0.158
YDR079W	0.039	0.65	0.044	0.433	0.038	0.101
YDR080W	0.04	0.611	0.047	0.211	0.042	0.158
YDR083W	0.04	0.358	0.048	0.377	0.042	0.304
YDR084C	0.04	0.773	0.074	0.598	0.042	0.372
YDR085C	0.039	0.67	0.061	0.57	0.046	0.236
YDR089W	0.037	0.719	0.04	0.614	0.039	0.193
YDR090C	0.038	0.799	0.04	0.604	0.0395	0.241
YDR092W	0.0385	0.777	0.039	0.4295	0.04	0.216
YDR093W	0.038	0.471	0.037	0.375	0.038	0.254
YDR094W	0.038	0.622	0.042	0.537	0.038	0.202
YDR095C	0.041	0.656	0.041	0.368	0.042	0.226
YDR096W	0.042	0.796	0.054	0.639	0.041	0.315
YDR097C	0.041	0.67	0.047	0.443	0.042	0.256
YDR098C	0.051	0.771	0.066	0.868	0.049	0.314
YDR099W	0.049	0.838	0.063	0.713	0.05	0.393
YDR100W	0.046	0.838	0.056	0.754	0.05	0.32
YDR101C	0.047	0.488	0.051	0.485	0.048	0.283
YDR102C	0.044	0.85	0.045	0.565	0.047	0.269
YDR104C	0.051	0.916	0.051	0.689	0.053	0.382
YDR105C	0.044	0.894	0.043	0.587	0.049	0.354
YDR107C	0.043	0.802	0.051	0.605	0.047	0.341
YDR108W	0.041	0.552	0.044	0.483	0.044	0.202
YDR109C	0.044	0.795	0.06	0.644	0.044	0.271
YDR110W	0.048	0.715	0.053	0.475	0.046	0.271
YDR111C	0.042	0.813	0.043	0.671	0.044	0.207
YDR112W	0.041	0.867	0.044	0.811	0.043	0.214
YDR114C	0.043	0.621	0.04	0.488	0.043	0.244
YDR115W	0.044	0.373	0.042	0.418	0.044	0.217
YDR116C	0.044	0.841	0.041	0.601	0.045	0.241
YDR117C	0.043	0.942	0.041	0.641	0.046	0.39
YDR119W	0.043	0.928	0.042	0.684	0.046	0.35
YDR120C	0.044	0.818	0.04	0.407	0.044	0.141
YDR121W	0.047	0.909	0.047	0.658	0.045	0.448
YDR122W	0.044	0.906	0.04	0.669	0.045	0.244
YDR123C	0.04	0.345	0.042	0.316	0.043	0.221
YDR124W	0.043	0.932	0.04	0.844	0.049	0.353
YDR125C	0.043	0.818	0.039	0.536	0.043	0.169
YDR126W	0.041	0.095	0.039	0.389	0.043	0.149
YDR127W	0.042	0.779	0.037	0.62	0.042	0.178
YDR128W	0.043	0.911	0.038	0.714	0.046	0.377
YDR129C	0.038	0.127	0.038	0.104	0.043	0.054
YDR130C	0.041	0.928	0.04	0.716	0.044	0.413
YDR131C	0.041	0.889	0.038	0.673	0.044	0.377
YDR132C	0.042	0.903	0.039	0.829	0.044	0.405
YDR133C	0.042	0.911	0.043	0.752	0.044	0.288
YDR134C	0.039	0.893	0.041	0.659	0.045	0.258
YDR135C	0.04	0.828	0.043	0.739	0.042	0.207
YDR136C	0.041	0.645	0.04	0.349	0.041	0.128
YDR137W	0.041	0.715	0.041	0.414	0.043	0.151
YDR138W	0.039	0.082	0.038	0.066	0.041	0.059
YDR139C	0.042	0.91	0.039	0.78	0.043	0.288
YDR140W	0.04	0.168	0.04	0.16	0.045	0.156
YDR142C	0.04	0.924	0.042	0.966	0.043	0.371
YDR143C	0.042	0.911	0.041	0.903	0.047	0.422
YDR147W	0.046	0.87	0.045	0.813	0.0455	0.3925
YDR148C	0.047	0.926	0.046	0.908	0.045	0.331
YDR149C	0.044	0.706	0.045	0.442	0.044	0.171
YDR150W	0.042	0.216	0.045	0.179	0.043	0.083
YDR151C	0.042	0.863	0.044	0.865	0.043	0.38
YDR152W	0.044	0.911	0.051	0.898	0.045	0.387
YDR153C	0.043	0.91	0.047	0.898	0.043	0.36
YDR154C	0.044	0.884	0.046	0.877	0.043	0.292
YDR155C	0.042	0.855	0.045	0.864	0.042	0.251
YDR156W	0.043	0.769	0.046	0.81	0.046	0.558
YDR157W	0.042	0.823	0.044	0.829	0.043	0.393
YDR158W	0.047	0.736	0.048	0.897	0.042	0.405
YDR159W	0.047	0.156	0.046	0.126	0.044	0.103
YDR161W	0.046	0.124	0.047	0.126	0.043	0.101
YDR162C	0.044	0.848	0.045	0.714	0.042	0.243
YDR163W	0.044	0.977	0.045	0.976	0.042	0.513
YDR165W	0.044	0.972	0.046	0.956	0.044	0.568
YDR169C	0.045	0.919	0.046	0.937	0.043	0.348
YDR169c-A	0.038	0.664	0.038	0.554	0.037	0.14
YDR171W	0.046	0.927	0.046	0.876	0.046	0.371
YDR173C	0.043	0.297	0.043	0.2	0.043	0.155
YDR174W	0.046	0.107	0.039	0.118	0.047	0.132
YDR175C	0.042	0.146	0.041	0.153	0.045	0.115
YDR176W	0.043	0.172	0.042	0.107	0.044	0.102
YDR178W	0.044	0.908	0.044	0.877	0.046	0.344
YDR179C	0.041	0.889	0.044	0.871	0.044	0.342
YDR179W-A	0.0395	0.8645	0.043	0.79	0.042	0.3375
YDR181C	0.045	0.85	0.045	0.895	0.044	0.435
YDR182w-A	0.037	0.644	0.041	0.567	0.037	0.162
YDR183W	0.042	0.945	0.044	0.853	0.043	0.453
YDR184C	0.043	0.879	0.045	0.816	0.043	0.363
YDR185C	0.044	0.935	0.041	0.84	0.042	0.348
YDR186C	0.042	0.89	0.043	0.867	0.038	0.457
YDR191W	0.041	0.915	0.042	0.836	0.039	0.304
YDR192C	0.04	0.833	0.04	0.806	0.038	0.229
YDR193W	0.04	0.791	0.043	0.849	0.039	0.209
YDR194C	0.052	0.112	0.051	0.126	0.051	0.099
YDR194w-A	0.037	0.635	0.039	0.313	0.037	0.119
YDR195W	0.047	0.085	0.047	0.1	0.048	0.072
YDR197W	0.049	0.724	0.049	0.467	0.05	0.283
YDR198C	0.051	0.93	0.049	0.861	0.051	0.569
YDR199W	0.049	0.912	0.047	0.822	0.051	0.565
YDR200C	0.055	0.444	0.052	0.332	0.049	0.116
YDR202C	0.048	0.094	0.043	0.344	0.049	0.098
YDR203W	0.046	0.079	0.045	0.182	0.046	0.124
YDR204W	0.045	0.69	0.046	0.582	0.046	0.26
YDR205W	0.047	0.844	0.044	0.451	0.057	0.164
YDR206W	0.046	0.912	0.046	0.847	0.043	0.425
YDR207C	0.042	0.13	0.042	0.067	0.044	0.061
YDR209C	0.045	0.88	0.044	0.677	0.043	0.401
YDR210W	0.046	0.91	0.044	0.862	0.042	0.483
YDR213W	0.047	0.895	0.043	0.869	0.044	0.468
YDR214W	0.043	0.934	0.044	0.887	0.042	0.647
YDR215C	0.043	0.918	0.044	0.861	0.04	0.613
YDR216W	0.042	0.884	0.043	0.822	0.039	0.589
YDR217C	0.045	0.869	0.042	0.792	0.04	0.378
YDR218C	0.045	0.926	0.044	0.887	0.04	0.571
YDR219C	0.041	0.862	0.042	0.768	0.04	0.38
YDR220C	0.04	0.868	0.042	0.789	0.038	0.571
YDR221W	0.043	0.908	0.042	0.837	0.04	0.772
YDR222W	0.042	0.852	0.039	0.794	0.039	0.588
YDR223W	0.04	0.866	0.042	0.776	0.038	0.539
YDR225W	0.041	0.569	0.038	0.291	0.039	0.161
YDR226W	0.038	0.076	0.038	0.062	0.037	0.049
YDR229W	0.044	0.89	0.041	0.851	0.053	0.564
YDR230W	0.047	0.742	0.046	0.622	0.044	0.298
YDR231C	0.045	0.732	0.046	0.612	0.044	0.283
YDR233C	0.045	0.9	0.043	0.855	0.044	0.663
YDR234W	0.045	0.923	0.042	0.867	0.042	0.694
YDR237W	0.046	0.574	0.041	0.601	0.048	0.358
YDR239C	0.042	0.9	0.042	0.815	0.04	0.472
YDR241W	0.045	0.243	0.042	0.24	0.042	0.236
YDR242W	0.051	0.921	0.039	0.737	0.048	0.677
YDR244W	0.044	0.821	0.043	0.798	0.043	0.612
YDR245W	0.04	0.066	0.044	0.091	0.043	0.076
YDR246w-A	0.04	0.854	0.036	0.816	0.036	0.148
YDR247W	0.04	0.723	0.042	0.729	0.046	0.46
YDR248C	0.04	0.779	0.042	0.74	0.044	0.582
YDR249C	0.042	0.846	0.042	0.755	0.044	0.537
YDR250C	0.041	0.776	0.041	0.675	0.042	0.404
YDR251W	0.039	0.777	0.045	0.786	0.042	0.427
YDR252W	0.04	0.692	0.043	0.768	0.042	0.561
YDR253C	0.041	0.677	0.056	0.792	0.043	0.43
YDR254W	0.043	0.818	0.056	0.673	0.055	0.717
YDR255C	0.04	0.883	0.057	0.704	0.047	0.578
YDR256C	0.041	0.846	0.042	0.749	0.042	0.726
YDR257C	0.04	0.649	0.045	0.657	0.046	0.563
YDR258C	0.04	0.815	0.049	0.726	0.045	0.549
YDR259C	0.041	0.877	0.043	0.758	0.047	0.724
YDR260C	0.04	0.721	0.044	0.673	0.044	0.589
YDR261C	0.04	0.844	0.042	0.7	0.043	0.621
YDR262W	0.039	0.655	0.043	0.633	0.042	0.501
YDR263C	0.041	0.762	0.041	0.651	0.042	0.595
YDR264C	0.039	0.058	0.04	0.068	0.04	0.048
YDR265W	0.042	0.743	0.044	0.743	0.043	0.491
YDR266C	0.046	0.858	0.054	0.719	0.054	0.638
YDR268W	0.041	0.224	0.042	0.356	0.043	0.282
YDR269C	0.038	0.952	0.039	0.826	0.041	0.202
YDR270W	0.038	0.729	0.045	0.616	0.043	0.416
YDR271C	0.038	0.942	0.0395	0.4235	0.0415	0.129
YDR272W	0.045	0.826	0.044	0.632	0.043	0.695
YDR273W	0.04	0.627	0.043	0.678	0.041	0.604
YDR274C	0.039	0.733	0.043	0.677	0.041	0.573
YDR275W	0.039	0.689	0.044	0.753	0.042	0.62
YDR276C	0.039	0.649	0.043	0.554	0.04	0.181
YDR277C	0.041	0.693	0.045	0.766	0.043	0.562
YDR278C	0.042	0.917	0.059	0.766	0.055	0.78
YDR279W	0.041	0.876	0.057	0.696	0.048	0.695
YDR281C	0.04	0.752	0.048	0.679	0.044	0.599
YDR282C	0.038	0.808	0.048	0.607	0.045	0.608
YDR283C	0.039	0.816	0.044	0.821	0.049	0.757
YDR284C	0.04	0.871	0.045	0.711	0.044	0.767
YDR285W	0.039	0.737	0.044	0.614	0.043	0.512
YDR286C	0.039	0.48	0.042	0.668	0.04	0.409
YDR287W	0.039	0.776	0.046	0.934	0.04	0.468
YDR289C	0.04	0.055	0.045	0.083	0.044	0.1
YDR290W	0.0425	0.053	0.05	0.098	0.047	0.0775
YDR291W	0.047	0.867	0.069	0.681	0.053	0.703
YDR293C	0.043	0.215	0.047	0.281	0.046	0.172
YDR294C	0.045	0.844	0.055	0.602	0.053	0.787
YDR295C	0.045	0.756	0.046	0.684	0.049	0.653
YDR296W	0.045	0.11	0.05	0.2	0.046	0.168
YDR297W	0.045	0.381	0.045	0.551	0.044	0.377
YDR298C	0.043	0.126	0.047	0.205	0.043	0.144
YDR300C	0.043	0.064	0.047	0.063	0.041	0.05
YDR304C	0.042	0.839	0.045	0.652	0.045	0.677
YDR305C	0.042	0.727	0.047	0.575	0.043	0.558
YDR306C	0.041	0.711	0.049	0.567	0.046	0.552
YDR307W	0.04	0.777	0.044	0.622	0.045	0.516
YDR309C	0.04	0.774	0.048	0.742	0.042	0.642
YDR310C	0.04	0.694	0.046	0.698	0.04	0.244
YDR312W	0.041	0.754	0.043	0.566	0.042	0.395
YDR313C	0.042	0.781	0.047	0.691	0.044	0.616
YDR314C	0.041	0.856	0.063	0.863	0.05	0.702
YDR315C	0.0385	0.393	0.053	0.4145	0.0435	0.32
YDR316W	0.046	0.893	0.044	0.685	0.043	0.696
YDR317W	0.042	0.857	0.046	0.806	0.045	0.638
YDR318W	0.038	0.4795	0.0445	0.3525	0.041	0.193
YDR319C	0.04	0.851	0.045	0.766	0.046	0.669
YDR320C	0.04	0.267	0.049	0.256	0.042	0.195
YDR321W	0.039	0.82	0.045	0.624	0.042	0.569
YDR322c-A	0.039	0.079	0.037	0.133	0.035	0.068
YDR322W	0.038	0.332	0.048	0.349	0.041	0.252
YDR323C	0.039	0.105	0.046	0.076	0.042	0.05
YDR326C	0.047	0.923	0.039	0.659	0.041	0.503
YDR329C	0.042	0.875	0.05	0.749	0.044	0.631
YDR330W	0.042	0.896	0.056	0.759	0.046	0.682
YDR332W	0.04	0.227	0.049	0.307	0.043	0.289
YDR333C	0.042	0.841	0.052	0.835	0.042	0.638
YDR334W	0.04	0.632	0.05	0.681	0.041	0.407
YDR337W	0.041	0.359	0.052	0.581	0.042	0.319
YDR338C	0.052	0.988	0.046	0.78	0.044	0.379
YDR340W	0.048	0.978	0.045	0.793	0.046	0.375
YDR344C	0.048	0.982	0.041	0.779	0.042	0.333
YDR345C	0.043	1.037	0.043	0.748	0.043	0.357
YDR346C	0.045	1.018	0.042	0.64	0.042	0.231
YDR347W	0.045	0.756	0.04	0.505	0.043	0.168
YDR348C	0.044	0.877	0.042	0.679	0.042	0.217
YDR349C	0.05	1.02	0.046	0.749	0.042	0.316
YDR350C	0.043	0.795	0.043	0.338	0.042	0.194
YDR351W	0.047	1.01	0.045	0.867	0.042	0.362
YDR352W	0.045	0.96	0.042	0.861	0.041	0.297
YDR354W	0.043	0.906	0.038	0.637	0.041	0.355
YDR357C	0.044	0.932	0.038	0.635	0.04	0.453
YDR358W	0.041	0.976	0.039	0.653	0.039	0.302
YDR359C	0.043	0.304	0.038	0.087	0.038	0.063
YDR360W	0.042	0.838	0.04	0.629	0.038	0.168
YDR363W	0.051	0.752	0.043	0.401	0.042	0.107
YDR363W-A	0.039	0.665	0.04	0.248	0.041	0.157
YDR364C	0.047	0.897	0.043	0.544	0.042	0.278
YDR368W	0.046	0.966	0.042	0.696	0.044	0.486
YDR369C	0.044	0.353	0.04	0.078	0.043	0.104
YDR370C	0.046	0.978	0.041	0.614	0.044	0.574
YDR371W	0.044	0.967	0.04	0.75	0.042	0.357
YDR372C	0.042	0.892	0.04	0.548	0.041	0.163
YDR374C	0.042	0.917	0.042	0.828	0.04	0.204
YDR375C	0.042	0.783	0.042	0.302	0.041	0.121
YDR377W	0.042	0.849	0.04	0.567	0.04	0.243
YDR378C	0.04	0.206	0.04	0.122	0.043	0.172
YDR379c-A	0.04	0.874	0.038	0.871	0.035	0.183
YDR379W	0.04	0.902	0.039	0.687	0.04	0.324
YDR380W	0.04	0.93	0.038	0.637	0.039	0.334
YDR382W	0.042	0.89	0.04	0.676	0.043	0.428
YDR383C	0.041	0.934	0.041	0.622	0.042	0.428
YDR384C	0.043	0.938	0.039	0.627	0.04	0.326
YDR385W	0.039	0.755	0.039	0.433	0.038	0.138
YDR386W	0.04	0.761	0.039	0.562	0.038	0.102
YDR387C	0.042	0.941	0.041	0.561	0.038	0.258
YDR388W	0.041	0.363	0.041	0.179	0.039	0.062
YDR389W	0.056	0.931	0.052	0.518	0.049	0.369
YDR391C	0.05	0.936	0.049	0.724	0.05	0.473
YDR392W	0.048	0.36	0.048	0.11	0.051	0.143
YDR393W	0.051	0.792	0.049	0.433	0.051	0.374
YDR395W	0.049	0.886	0.048	0.612	0.048	0.37
YDR399W	0.049	0.865	0.048	0.57	0.046	0.103
YDR400W	0.051	0.994	0.047	0.806	0.048	0.196
YDR401W	0.047	0.969	0.045	0.886	0.043	0.408
YDR402C	0.045	0.932	0.043	0.845	0.044	0.45
YDR403W	0.043	0.886	0.042	0.55	0.042	0.449
YDR405W	0.044	0.746	0.04	0.371	0.043	0.301
YDR406W	0.045	0.918	0.041	0.803	0.044	0.534
YDR408C	0.042	0.785	0.041	0.609	0.041	0.315
YDR409W	0.042	0.905	0.041	0.81	0.039	0.152
YDR411C	0.043	0.915	0.042	0.567	0.039	0.164
YDR414C	0.042	0.791	0.041	0.462	0.04	0.2
YDR415C	0.041	0.936	0.04	0.68	0.04	0.412
YDR417C	0.0505	0.63	0.042	0.216	0.0475	0.2825
YDR418W	0.043	0.333	0.04	0.124	0.044	0.186
YDR419W	0.042	0.962	0.039	0.713	0.044	0.425
YDR420W	0.041	0.93	0.039	0.659	0.038	0.285
YDR421W	0.041	0.882	0.04	0.813	0.038	0.383
YDR422C	0.042	0.877	0.039	0.639	0.039	0.144
YDR423C	0.044	0.941	0.041	0.457	0.038	0.283
YDR424C	0.046	0.858	0.045	0.754	0.042	0.348
YDR425W	0.047	0.927	0.043	0.67	0.044	0.27
YDR426C	0.047	0.946	0.046	0.924	0.043	0.368
YDR428C	0.047	0.983	0.041	0.714	0.045	0.591
YDR430C	0.046	0.927	0.041	0.684	0.043	0.281
YDR431W	0.044	0.888	0.04	0.431	0.045	0.372
YDR432W	0.046	0.239	0.041	0.093	0.042	0.121
YDR433W	0.047	0.152	0.041	0.0895	0.039	0.0655
YDR435C	0.046	0.875	0.044	0.466	0.04	0.091
YDR438W	0.045	0.946	0.045	0.903	0.043	0.375
YDR439W	0.047	0.572	0.047	0.388	0.045	0.162
YDR440W	0.048	0.969	0.046	0.94	0.043	0.444
YDR441C	0.044	0.931	0.043	0.868	0.042	0.271
YDR442W	0.045	0.704	0.039	0.266	0.04	0.098
YDR443C	0.044	0.468	0.041	0.473	0.042	0.289
YDR444W	0.046	0.905	0.039	0.33	0.045	0.439
YDR445C	0.052	0.926	0.043	0.742	0.052	0.362
YDR446W	0.042	0.918	0.04	0.881	0.04	0.222
YDR447C	0.04	0.675	0.041	0.741	0.04	0.141
YDR448W	0.041	0.175	0.0405	0.1125	0.039	0.073
YDR450W	0.044	0.494	0.043	0.408	0.042	0.137
YDR451C	0.045	0.879	0.044	0.81	0.043	0.343
YDR452W	0.043	0.95	0.041	1.057	0.039	0.387
YDR453C	0.041	0.911	0.04	0.813	0.04	0.196
YDR455C	0.039	0.837	0.038	0.754	0.038	0.157
YDR456W	0.039	0.806	0.039	0.813	0.038	0.223
YDR457W	0.039	0.761	0.039	0.723	0.038	0.152
YDR458C	0.039	0.906	0.039	0.922	0.038	0.283
YDR459C	0.037	0.703	0.037	0.622	0.037	0.208
YDR461W	0.05	0.924	0.041	0.377	0.046	0.578
YDR462W	0.041	0.643	0.044	0.682	0.04	0.147
YDR463W	0.05	0.277	0.046	0.155	0.042	0.078
YDR465C	0.044	0.954	0.044	0.869	0.042	0.331
YDR466W	0.043	0.91	0.042	0.995	0.04	0.221
YDR467C	0.042	0.904	0.041	0.961	0.04	0.292
YDR469W	0.04	0.503	0.04	0.35	0.039	0.114
YDR470C	0.04	0.567	0.04	0.553	0.038	0.08
YDR471W	0.039	0.358	0.04	0.351	0.039	0.1
YDR474C	0.041	0.889	0.042	0.763	0.043	0.381
YDR475C	0.039	0.9355	0.0395	0.8725	0.0385	0.3555
YDR476C	0.039	0.896	0.039	0.798	0.038	0.249
YDR477W	0.04	0.243	0.0395	0.072	0.0375	0.05
YDR479C	0.04	0.92	0.04	0.994	0.04	0.377
YDR480W	0.039	0.863	0.04	0.969	0.041	0.303
YDR481C	0.039	0.886	0.039	0.806	0.038	0.225
YDR482C	0.038	0.865	0.038	0.991	0.038	0.313
YDR483W	0.04	0.748	0.038	0.679	0.037	0.131
YDR484W	0.039	0.708	0.04	0.423	0.039	0.141
YDR485C	0.0375	0.6775	0.041	0.481	0.039	0.175
YDR486C	0.037	0.802	0.04	0.498	0.038	0.281
YDR488C	0.051	0.863	0.049	0.871	0.049	0.253
YDR490C	0.049	0.914	0.05	0.894	0.051	0.417
YDR491C	0.049	0.913	0.05	0.994	0.048	0.434
YDR492W	0.051	0.971	0.05	1.092	0.05	0.734
YDR493W	0.048	0.932	0.043	0.901	0.051	0.838
YDR494W	0.048	0.873	0.044	0.777	0.045	0.268
YDR495C	0.045	0.223	0.046	0.078	0.045	0.049
YDR496C	0.045	0.489	0.045	0.493	0.043	0.208
YDR497C	0.045	0.394	0.044	0.252	0.044	0.124
YDR500C	0.043	0.59	0.041	0.5645	0.043	0.193
YDR501W	0.039	0.893	0.043	0.875	0.0415	0.2315
YDR502C	0.043	0.989	0.038	0.789	0.044	0.06
YDR503C	0.041	0.917	0.043	0.987	0.041	0.455
YDR504C	0.04	0.914	0.042	1.071	0.042	0.747
YDR505C	0.04	0.905	0.041	1.064	0.041	0.411
YDR506C	0.0415	0.91	0.039	0.8845	0.0425	0.602
YDR507C	0.04	0.194	0.04	0.294	0.044	0.158
YDR508C	0.04	0.894	0.041	0.88	0.04	0.659
YDR509W	0.04	0.89	0.041	0.747	0.041	0.336
YDR511W	0.041	0.971	0.042	1.045	0.04	0.399
YDR512C	0.043	0.891	0.039	0.811	0.0435	0.2835
YDR513W	0.045	0.975	0.043	1.058	0.041	0.354
YDR514C	0.043	0.957	0.041	1.053	0.039	0.398
YDR515W	0.046	0.938	0.038	0.747	0.043	0.385
YDR516C	0.064	0.997	0.041	1.054	0.043	0.673
YDR517W	0.04	0.919	0.041	1.034	0.039	0.409
YDR518W	0.039	0.6785	0.0425	0.608	0.0405	0.1755
YDR519W	0.039	0.637	0.039	0.615	0.038	0.271
YDR520C	0.04	0.729	0.04	0.601	0.039	0.291
YDR521W	0.039	0.739	0.039	0.647	0.04	0.269
YDR522C	0.044	0.962	0.041	1.024	0.05	0.755
YDR523C	0.049	1.015	0.044	1.114	0.043	0.511
YDR524C	0.044	0.971	0.04	1.03	0.041	0.242
YDR524c-B	0.04	0.042	0.035	0.038	0.036	0.039
YDR524w-A	0.049	0.931	0.041	0.912	0.038	0.332
YDR525W	0.044	0.871	0.042	0.838	0.041	0.384
YDR525W-A	0.044	0.91	0.041	0.539	0.044	0.229
YDR528W	0.041	0.842	0.039	0.731	0.039	0.144
YDR529C	0.041	0.558	0.04	0.366	0.05	0.13
YDR530C	0.045	0.908	0.041	0.983	0.041	0.623
YDR532C	0.041	0.046	0.04	0.049	0.043	0.057
YDR533C	0.043	0.294	0.041	0.313	0.044	0.223
YDR534C	0.046	0.99	0.041	0.76	0.065	0.245
YDR535C	0.046	0.927	0.044	0.645	0.042	0.265
YDR536W	0.043	0.91	0.044	0.657	0.042	0.237
YDR537C	0.042	0.753	0.056	0.736	0.053	0.278
YDR538W	0.048	0.949	0.043	0.832	0.045	0.262
YDR539W	0.046	0.936	0.038	0.516	0.042	0.331
YDR540C	0.042	0.803	0.04	0.196	0.042	0.142
YDR541C	0.044	0.882	0.041	0.597	0.047	0.369
YEL001C	0.051	1.004	0.051	0.817	0.058	0.867
YEL003W	0.049	0.984	0.054	0.767	0.053	0.632
YEL004W	0.044	0.98	0.049	0.796	0.049	0.748
YEL005C	0.045	0.994	0.05	0.84	0.041	0.749
YEL006W	0.046	0.988	0.05	0.73	0.044	0.531
YEL007W	0.045	0.37	0.05	0.929	0.043	0.418
YEL008W	0.046	0.996	0.048	0.821	0.051	0.818
YEL009C	0.046	1.013	0.047	0.764	0.047	0.835
YEL010W	0.042	1.007	0.046	0.774	0.052	0.732
YEL011W	0.043	0.864	0.042	0.694	0.042	0.398
YEL012W	0.049	0.875	0.048	0.719	0.049	0.191
YEL013W	0.046	1.025	0.048	0.858	0.046	0.62
YEL014C	0.042	1.006	0.051	0.908	0.04	0.547
YEL015W	0.043	1.001	0.053	0.895	0.046	0.81
YEL016C	0.041	0.988	0.047	0.857	0.041	0.521
YEL017C-A	0.043	0.988	0.047	0.795	0.041	0.406
YEL017W	0.043	1.001	0.046	0.868	0.044	0.614
YEL018W	0.041	0.987	0.042	0.615	0.047	0.828
YEL020C	0.045	0.996	0.043	0.675	0.04	0.471
YEL022W	0.042	0.888	0.042	0.752	0.04	0.233
YEL023C	0.045	0.998	0.048	0.675	0.051	0.7
YEL024W	0.042	0.387	0.05	0.362	0.041	0.125
YEL025C	0.041	1.014	0.054	0.884	0.041	0.37
YEL027W	0.041	0.178	0.049	0.049	0.04	0.041
YEL028W	0.043	1.006	0.049	0.87	0.044	0.628
YEL029C	0.043	1.017	0.048	0.882	0.047	0.721
YEL030W	0.043	1.008	0.046	0.826	0.049	0.805
YEL031W	0.042	0.733	0.046	0.324	0.04	0.329
YEL033W	0.039	0.389	0.042	0.206	0.044	0.205
YEL036C	0.038	0.333	0.044	0.303	0.037	0.062
YEL037C	0.037	0.98	0.047	0.894	0.039	0.179
YEL038W	0.039	0.99	0.056	0.877	0.04	0.231
YEL039C	0.038	1.028	0.05	0.894	0.045	0.577
YEL040W	0.042	1.008	0.047	0.888	0.044	0.838
YEL041W	0.0395	0.9405	0.045	0.765	0.0455	0.712
YEL042W	0.042	0.943	0.044	0.851	0.04	0.728
YEL043W	0.044	0.983	0.047	0.827	0.048	0.726
YEL044W	0.038	0.193	0.043	0.129	0.038	0.103
YEL045C	0.039	0.052	0.04	0.043	0.04	0.047
YEL046C	0.039	0.071	0.041	0.046	0.042	0.052
YEL047C	0.044	1.01	0.047	0.704	0.047	0.679
YEL048C	0.048	0.99	0.056	0.839	0.051	0.397
YEL049W	0.045	1.007	0.056	0.937	0.048	0.3
YEL050C	0.048	0.54	0.058	0.634	0.049	0.289
YEL051W	0.044	0.119	0.049	0.051	0.046	0.048
YEL052W	0.046	1.01	0.056	0.904	0.053	0.762
YEL053C	0.049	0.961	0.061	0.846	0.061	0.999
YEL054C	0.052	0.705	0.067	0.749	0.06	1.043
YEL056W	0.045	0.999	0.05	0.866	0.052	0.481
YEL057C	0.045	0.996	0.045	0.705	0.045	0.294
YEL059c-A	0.038	0.878	0.037	0.75	0.035	0.158
YEL059W	0.04	0.996	0.048	0.857	0.042	0.326
YEL060C	0.04	0.958	0.048	0.894	0.042	0.304
YEL061C	0.04	0.775	0.047	0.599	0.042	0.167
YEL062W	0.042	0.497	0.044	0.322	0.045	0.112
YEL063C	0.044	0.981	0.049	0.883	0.048	0.602
YEL064C	0.044	0.992	0.054	0.907	0.052	0.85
YEL065W	0.044	0.984	0.061	0.89	0.042	0.938
YEL066W	0.042	0.975	0.051	0.848	0.043	0.725
YEL067C	0.042	0.988	0.047	0.823	0.044	0.834
YEL068C	0.042	1.017	0.045	0.835	0.043	0.423
YEL071W	0.044	0.979	0.051	0.836	0.045	0.556
YEL072W	0.04	0.994	0.048	0.908	0.044	0.797
YER001W	0.044	1	0.047	0.856	0.043	0.528
YER002W	0.041	0.973	0.043	0.712	0.039	0.482
YER004W	0.045	1.046	0.051	0.855	0.029	0.03
YER005W	0.044	0.971	0.047	0.793	0.029	0.03
YER007C-A	0.048	1.023	0.047	0.837	0.031	0.032
YER007w	0.047	0.861	0.0405	0.5565	0.034	0.201
YER010C	0.047	1.01	0.046	0.797	0.029	0.031
YER011W	0.043	1.009	0.043	0.666	0.027	0.028
YER014C-A	0.044	0.045	0.051	0.129	0.045	0.044
YER015W	0.039	0.813	0.039	0.407	0.037	0.295
YER016W	0.049	0.805	0.05	0.254	0.043	0.116
YER017C	0.042	0.373	0.048	0.189	0.041	0.193
YER019C-A	0.042	1.053	0.046	0.456	0.042	0.325
YER019W	0.043	0.766	0.046	0.138	0.041	0.14
YER020W	0.042	1.019	0.045	0.448	0.041	0.258
YER024W	0.048	0.971	0.05	0.37	0.045	0.163
YER026C	0.039	0.045	0.04	0.047	0.037	0.052
YER027C	0.043	0.911	0.04	0.836	0.039	0.624
YER028C	0.0405	0.9505	0.0445	0.672	0.041	0.35
YER030W	0.042	1.043	0.048	0.437	0.043	0.417
YER031C	0.048	0.885	0.047	0.67	0.044	0.303
YER032W	0.039	0.999	0.045	0.508	0.04	0.27
YER033C	0.038	0.816	0.044	0.276	0.038	0.125
YER034W	0.038	0.85	0.045	0.231	0.038	0.143
YER037W	0.044	0.955	0.042	0.921	0.043	0.772
YER038W-A	0.041	1.109	0.049	0.524	0.041	0.153
YER039C	0.041	1.132	0.049	0.561	0.045	0.305
YER039C-A	0.044	0.9	0.04	0.601	0.043	0.449
YER040W	0.042	0.383	0.049	0.109	0.047	0.135
YER041W	0.04	1.154	0.049	0.442	0.041	0.226
YER042W	0.043	1.08	0.049	0.626	0.042	0.381
YER044C	0.04	0.045	0.045	0.047	0.045	0.045
YER044C-A	0.041	1.092	0.047	0.241	0.04	0.188
YER045C	0.04	1.078	0.047	0.497	0.041	0.211
YER046W	0.046	0.883	0.045	0.73	0.045	0.461
YER046W-A	0.042	0.904	0.045	0.533	0.04	0.242
YER047C	0.039	0.972	0.046	0.601	0.039	0.196
YER048C	0.04	1.021	0.047	0.785	0.039	0.195
YER049W	0.04	1.038	0.045	0.798	0.039	0.317
YER050C	0.04	0.382	0.046	0.089	0.042	0.135
YER051W	0.041	0.953	0.049	0.841	0.041	0.444
YER052C	0.04	0.962	0.047	0.606	0.043	0.598
YER053C	0.041	1.002	0.052	0.821	0.039	0.498
YER053c-A	0.038	0.659	0.036	0.546	0.036	0.163
YER054C	0.039	0.942	0.046	0.629	0.042	0.251
YER055C	0.04	0.924	0.046	0.565	0.039	0.155
YER056C	0.04	0.816	0.046	0.183	0.037	0.064
YER056C-A	0.04	0.885	0.048	0.316	0.041	0.163
YER057C	0.051	0.909	0.057	0.6	0.048	0.24
YER058W	0.049	0.771	0.055	0.589	0.045	0.204
YER059W	0.049	0.88	0.054	0.645	0.046	0.206
YER060W	0.046	0.982	0.052	0.687	0.043	0.214
YER060W-A	0.049	0.991	0.056	0.844	0.049	0.506
YER061C	0.046	0.478	0.052	0.156	0.045	0.208
YER062C	0.06	1.1	0.076	0.815	0.056	0.565
YER063W	0.044	0.816	0.043	0.644	0.042	0.257
YER064C	0.04	0.838	0.041	0.612	0.041	0.189
YER065C	0.044	1.073	0.05	0.579	0.041	0.271
YER066C-A	0.045	0.991	0.053	0.624	0.046	0.296
YER066W	0.048	0.841	0.046	0.694	0.043	0.272
YER067C-A	0.043	0.945	0.048	0.687	0.042	0.2
YER067W	0.043	0.927	0.048	0.517	0.045	0.163
YER068C-A	0.042	0.942	0.047	0.677	0.041	0.217
YER068W	0.042	0.06	0.046	0.048	0.041	0.041
YER069W	0.041	0.958	0.05	0.748	0.043	0.442
YER070W	0.041	0.05	0.047	0.046	0.043	0.044
YER071C	0.042	0.97	0.047	0.585	0.043	0.344
YER072W	0.04	0.533	0.046	0.284	0.039	0.132
YER073W	0.041	1.082	0.049	0.642	0.042	0.223
YER074W	0.041	0.558	0.047	0.206	0.038	0.063
YER075C	0.041	1.019	0.048	0.47	0.038	0.162
YER076C	0.039	0.865	0.042	0.727	0.037	0.264
YER077C	0.046	0.582	0.043	0.504	0.041	0.199
YER078C	0.045	0.933	0.044	0.885	0.045	0.53
YER079W	0.043	1.075	0.047	0.571	0.041	0.21
YER080W	0.041	1.106	0.047	0.764	0.037	0.325
YER081W	0.039	0.856	0.046	0.184	0.04	0.053
YER083C	0.04	0.181	0.047	0.056	0.043	0.047
YER084W	0.039	1.053	0.048	0.442	0.039	0.159
YER085C	0.039	1.053	0.044	0.581	0.037	0.16
YER086W	0.04	0.219	0.046	0.155	0.037	0.046
YER087C-A	0.042	1.129	0.048	0.519	0.038	0.173
YER087c-B	0.044	0.792	0.037	0.488	0.038	0.226
YER087W	0.0385	0.162	0.0435	0.252	0.0385	0.124
YER088C	0.043	0.844	0.043	0.79	0.042	0.344
YER089C	0.044	0.922	0.038	0.661	0.041	0.674
YER090W	0.046	0.85	0.042	0.782	0.044	0.48
YER091C	0.043	0.883	0.045	0.842	0.045	0.539
YER091C-A	0.045	0.867	0.041	0.677	0.044	0.368
YER092W	0.061	0.957	0.045	0.812	0.046	0.618
YER093C-A	0.042	0.919	0.041	0.711	0.039	0.575
YER095W	0.041	0.486	0.043	0.136	0.04	0.067
YER096W	0.041	0.942	0.041	0.824	0.039	0.391
YER097W	0.041	0.899	0.04	0.786	0.04	0.346
YER098W	0.043	0.917	0.041	0.888	0.041	0.406
YER099c	0.045	0.863	0.036	0.625	0.041	0.521
YER101C	0.053	0.892	0.049	0.676	0.045	0.58
YER103W	0.052	0.917	0.046	0.758	0.048	0.638
YER105c	0.045	0.9	0.038	0.609	0.038	0.374
YER106W	0.049	0.895	0.045	0.674	0.047	0.483
YER108C	0.05	0.856	0.046	0.708	0.049	0.566
YER109C	0.043	0.849	0.0435	0.796	0.0445	0.558
YER110C	0.047	0.371	0.043	0.622	0.046	0.273
YER111C	0.053	0.655	0.046	0.468	0.046	0.446
YER113C	0.045	0.912	0.043	0.631	0.048	0.683
YER114C	0.045	0.858	0.042	0.593	0.046	0.635
YER115C	0.046	0.881	0.041	0.636	0.045	0.593
YER116C	0.044	0.133	0.044	0.153	0.042	0.141
YER117W	0.044	0.723	0.044	0.492	0.044	0.409
YER118C	0.044	0.838	0.047	0.719	0.049	0.373
YER119C	0.045	0.827	0.042	0.676	0.045	0.458
YER119C-A	0.043	0.571	0.044	0.622	0.042	0.575
YER120W	0.043	0.651	0.043	0.627	0.042	0.496
YER121W	0.044	0.804	0.046	0.635	0.046	0.508
YER122C	0.048	0.162	0.047	0.326	0.044	0.298
YER123W	0.045	0.622	0.044	0.666	0.047	0.209
YER124C	0.046	0.851	0.05	0.557	0.049	0.475
YER128W	0.044	0.879	0.047	0.714	0.047	0.628
YER129W	0.047	0.748	0.043	0.486	0.044	0.252
YER130C	0.048	0.864	0.046	0.655	0.044	0.595
YER131W	0.048	0.64	0.045	0.608	0.043	0.372
YER132C	0.045	0.834	0.047	0.754	0.047	0.455
YER134C	0.043	0.885	0.043	0.714	0.045	0.615
YER135C	0.042	0.873	0.045	0.67	0.044	0.609
YER137C	0.043	0.834	0.044	0.617	0.046	0.558
YER139C	0.045	0.424	0.047	0.541	0.049	0.345
YER140W	0.053	0.94	0.048	0.818	0.047	0.688
YER141W	0.043	0.643	0.053	0.674	0.048	0.443
YER142C	0.046	0.905	0.045	0.738	0.052	0.474
YER143W	0.046	0.862	0.045	0.606	0.045	0.601
YER144C	0.046	0.891	0.042	0.643	0.047	0.367
YER145C	0.046	0.827	0.043	0.514	0.046	0.141
YER149C	0.055	0.801	0.051	0.706	0.051	0.363
YER150W	0.055	0.829	0.051	0.64	0.053	0.499
YER151C	0.052	0.607	0.047	0.169	0.049	0.133
YER152C	0.053	0.881	0.048	0.715	0.048	0.614
YER153C	0.055	0.466	0.051	0.458	0.051	0.302
YER154W	0.056	0.474	0.052	0.476	0.051	0.47
YER155C	0.0445	0.0545	0.0415	0.049	0.042	0.0505
YER156C	0.051	0.647	0.051	0.526	0.05	0.288
YER158C	0.046	0.81	0.048	0.682	0.047	0.309
YER161C	0.052	0.945	0.049	0.788	0.048	0.785
YER162C	0.053	0.925	0.048	0.737	0.05	0.722
YER163C	0.05	0.911	0.047	0.716	0.047	0.734
YER164W	0.049	0.895	0.047	0.687	0.049	0.624
YER166W	0.05	0.914	0.048	0.769	0.052	0.622
YER167W	0.047	0.832	0.048	0.462	0.054	0.588
YER169W	0.049	0.91	0.046	0.632	0.048	0.523
YER170W	0.047	0.908	0.045	0.707	0.047	0.635
YER173W	0.046	0.894	0.045	0.688	0.046	0.596
YER174C	0.044	0.909	0.045	0.729	0.049	0.732
YER175C	0.045	0.906	0.045	0.658	0.047	0.592
YER175w-A	0.049	0.858	0.045	0.852	0.043	0.174
YER176W	0.045	0.902	0.046	0.696	0.048	0.637
YER177W	0.046	0.775	0.048	0.657	0.046	0.6
YER178W	0.044	0.864	0.049	0.743	0.05	0.646
YER179W	0.047	0.915	0.05	0.795	0.052	0.592
YER180C	0.045	0.901	0.042	0.697	0.044	0.357
YER180c-A	0.045	0.047	0.038	0.044	0.039	0.046
YER181C	0.044	0.908	0.042	0.653	0.046	0.429
YER182W	0.044	0.848	0.048	0.734	0.043	0.352
YER183C	0.043	0.881	0.047	0.721	0.042	0.448
YER184C	0.044	0.769	0.04	0.69	0.042	0.229
YER185W	0.049	0.932	0.05	0.814	0.053	0.611
YER186C	0.049	0.897	0.046	0.683	0.048	0.552
YER186w-A	0.053	0.929	0.044	0.823	0.041	0.274
YER187W	0.05	0.907	0.048	0.688	0.05	0.556
YER188W	0.046	0.894	0.042	0.601	0.044	0.323
YFL001W	0.042	0.318	0.038	0.081	0.045	0.077
YFL003C	0.044	0.905	0.045	0.226	0.042	0.432
YFL004W	0.04	0.719	0.041	0.367	0.043	0.619
YFL006W	0.042	0.646	0.041	0.268	0.041	0.089
YFL007W	0.039	0.783	0.038	0.413	0.09	0.081
YFL010C	0.041	0.835	0.039	0.605	0.043	0.587
YFL010W-A	0.04	0.852	0.0405	0.7785	0.0395	0.444
YFL011W	0.046	0.55	0.041	0.238	0.045	0.088
YFL012W	0.04	0.876	0.038	0.734	0.042	0.32
YFL013C	0.044	0.892	0.039	0.77	0.042	0.227
YFL013W-A	0.044	0.882	0.039	0.804	0.044	0.273
YFL014W	0.042	0.878	0.038	0.849	0.043	0.309
YFL015C	0.042	0.723	0.04	0.279	0.04	0.094
YFL016C	0.04	0.153	0.037	0.09	0.04	0.159
YFL018C	0.044	0.684	0.04	0.212	0.04	0.216
YFL019C	0.039	0.793	0.037	0.459	0.041	0.12
YFL020C	0.038	0.61	0.037	0.164	0.043	0.088
YFL021W	0.039	0.594	0.039	0.336	0.042	0.096
YFL023W	0.048	0.053	0.043	0.049	0.043	0.045
YFL025C	0.044	0.085	0.043	0.062	0.042	0.05
YFL027C	0.043	0.721	0.045	0.346	0.042	0.128
YFL028C	0.047	0.677	0.042	0.414	0.044	0.103
YFL030W	0.044	0.725	0.04	0.221	0.041	0.108
YFL031W	0.042	0.7025	0.042	0.552	0.0425	0.2535
YFL032W	0.041	0.488	0.04	0.199	0.047	0.086
YFL033C	0.037	0.645	0.039	0.417	0.039	0.3105
YFL034C-A	0.047	0.923	0.042	0.611	0.042	0.261
YFL034W	0.048	0.885	0.044	0.671	0.044	0.111
YFL035C-B	0.048	0.787	0.041	0.615	0.042	0.122
YFL036W	0.047	0.713	0.041	0.417	0.042	0.195
YFL040W	0.041	0.609	0.037	0.185	0.04	0.092
YFL041W	0.04	0.662	0.038	0.16	0.043	0.082
YFL041w-A	0.045	0.84	0.045	0.881	0.041	0.192
YFL042C	0.0395	0.908	0.04	0.7795	0.0415	0.4545
YFL043C	0.04	0.383	0.038	0.146	0.039	0.071
YFL044C	0.049	0.767	0.049	0.357	0.049	0.107
YFL046W	0.047	0.558	0.045	0.203	0.045	0.101
YFL047W	0.044	0.625	0.044	0.311	0.048	0.094
YFL048C	0.046	0.53	0.044	0.388	0.045	0.116
YFL049W	0.053	0.553	0.05	0.352	0.048	0.171
YFL050C	0.052	0.732	0.048	0.374	0.051	0.136
YFL051C	0.054	0.721	0.045	0.351	0.047	0.119
YFL052W	0.053	0.78	0.046	0.306	0.048	0.156
YFL053W	0.047	0.745	0.043	0.3	0.046	0.113
YFL054C	0.048	0.747	0.043	0.291	0.049	0.167
YFL055W	0.051	0.717	0.046	0.321	0.047	0.104
YFL056C	0.051	0.723	0.047	0.373	0.048	0.095
YFL063W	0.037	0.783	0.04	0.416	0.037	0.142
YFR001W	0.046	0.067	0.042	0.072	0.046	0.065
YFR006W	0.05	0.783	0.042	0.449	0.047	0.14
YFR007W	0.045	0.731	0.041	0.251	0.045	0.107
YFR008W	0.046	0.762	0.04	0.291	0.043	0.098
YFR009W	0.046	0.755	0.041	0.398	0.043	0.155
YFR010W	0.044	0.667	0.042	0.261	0.044	0.128
YFR011C	0.047	0.654	0.042	0.619	0.047	0.775
YFR012W	0.045	0.766	0.041	0.394	0.042	0.105
YFR012w-A	0.046	0.616	0.042	0.596	0.043	0.194
YFR013W	0.044	0.688	0.041	0.544	0.054	0.777
YFR014C	0.048	0.793	0.041	0.601	0.042	0.143
YFR015C	0.043	0.771	0.04	0.336	0.043	0.106
YFR016C	0.047	0.802	0.042	0.41	0.043	0.153
YFR017C	0.048	0.823	0.041	0.416	0.042	0.13
YFR018C	0.052	0.854	0.043	0.687	0.043	0.151
YFR019W	0.04	0.043	0.039	0.049	0.041	0.048
YFR020W	0.048	0.818	0.041	0.449	0.043	0.214
YFR021W	0.051	0.781	0.044	0.42	0.046	0.142
YFR022W	0.05	0.832	0.046	0.659	0.051	0.188
YFR023W	0.049	0.874	0.045	0.66	0.048	0.125
YFR024C	0.044	0.862	0.042	0.8	0.045	0.191
YFR024C-A	0.046	0.863	0.043	0.681	0.045	0.195
YFR025C	0.043	0.785	0.04	0.814	0.043	0.206
YFR026C	0.047	0.823	0.042	0.533	0.044	0.162
YFR030W	0.039	0.678	0.036	0.547	0.038	0.093
YFR031C-A	0.045	0.301	0.042	0.163	0.044	0.183
YFR032C	0.048	0.959	0.039	0.847	0.042	0.346
YFR032C-A	0.052	0.87	0.038	0.381	0.044	0.366
YFR032c-B	0.041	0.045	0.04	0.046	0.04	0.046
YFR033C	0.04	0.834	0.039	0.332	0.042	0.274
YFR034C	0.042	0.907	0.037	0.567	0.042	0.374
YFR035C	0.043	0.898	0.04	0.601	0.043	0.454
YFR036W	0.048	0.932	0.04	0.72	0.044	0.562
YFR038W	0.0415	0.8715	0.0405	0.6965	0.0405	0.3315
YFR039C	0.041	0.819	0.049	0.829	0.047	0.36
YFR040W	0.043	0.086	0.041	0.148	0.041	0.118
YFR041C	0.043	0.885	0.039	0.793	0.043	0.416
YFR043C	0.058	0.963	0.047	0.738	0.045	0.312
YFR044C	0.053	0.95	0.045	0.773	0.045	0.419
YFR045W	0.048	0.928	0.044	0.7595	0.045	0.428
YFR046C	0.044	0.916	0.045	0.646	0.047	0.414
YFR047C	0.048	0.912	0.045	0.691	0.048	0.477
YFR048W	0.049	0.89	0.044	0.623	0.044	0.38
YFR049W	0.058	0.966	0.045	0.736	0.044	0.494
YFR053C	0.049	0.858	0.045	0.667	0.044	0.367
YFR054C	0.051	0.934	0.046	0.701	0.04	0.37
YFR055W	0.045	0.939	0.04	0.615	0.042	0.241
YFR056C	0.043	0.892	0.04	0.632	0.04	0.257
YFR057W	0.043	0.887	0.041	0.731	0.043	0.326
YGL002W	0.044	0.883	0.042	0.874	0.046	0.361
YGL003C	0.045	0.657	0.047	0.74	0.048	0.299
YGL004C	0.044	0.826	0.044	0.902	0.049	0.365
YGL005C	0.042	0.727	0.042	0.785	0.045	0.354
YGL006W	0.044	0.898	0.042	1.014	0.05	0.526
YGL006w-A	0.044	0.737	0.042	0.611	0.04	0.169
YGL007c-A	0.044	0.814	0.044	0.357	0.042	0.184
YGL007W	0.045	0.393	0.041	0.201	0.044	0.069
YGL009C	0.042	0.816	0.042	1.065	0.044	0.454
YGL010W	0.043	0.863	0.042	1.017	0.047	0.453
YGL012W	0.04	0.203	0.042	0.301	0.045	0.057
YGL013C	0.048	0.904	0.04	0.819	0.042	0.422
YGL014W	0.04	0.842	0.041	1.063	0.041	0.663
YGL015C	0.038	0.776	0.041	1.052	0.041	0.326
YGL016W	0.039	0.668	0.04	1.052	0.04	0.463
YGL017W	0.038	0.846	0.042	1.14	0.042	0.495
YGL019W	0.038	0.594	0.043	0.601	0.038	0.553
YGL020C	0.037	0.055	0.042	0.102	0.039	0.049
YGL021W	0.037	0.718	0.041	1.065	0.04	0.387
YGL023C	0.038	0.776	0.0415	0.8495	0.039	0.3665
YGL025C	0.046	0.882	0.042	1.017	0.043	0.819
YGL026C	0.044	0.891	0.045	1.083	0.045	0.668
YGL027C	0.044	0.905	0.044	1.129	0.048	0.669
YGL028C	0.042	0.874	0.046	1.203	0.045	0.669
YGL031C	0.041	0.554	0.044	0.715	0.044	0.453
YGL032C	0.038	0.728	0.041	0.7955	0.04	0.3855
YGL033W	0.0385	0.7635	0.0445	0.8305	0.0405	0.3905
YGL034C	0.041	0.7	0.042	1.129	0.041	0.453
YGL035C	0.039	0.787	0.042	1.113	0.041	0.395
YGL036W	0.04	0.798	0.042	0.909	0.043	0.293
YGL037C	0.041	0.863	0.041	1.114	0.041	0.689
YGL038C	0.041	0.04	0.038	0.037	0.037	0.036
YGL039W	0.043	0.823	0.043	1.162	0.04	0.487
YGL041C	0.042	0.93	0.041	1.138	0.04	0.796
YGL041c-B	0.044	0.822	0.042	0.667	0.043	0.181
YGL042C	0.041	0.89	0.04	1.122	0.04	0.729
YGL043W	0.038	0.768	0.04	1.056	0.04	0.405
YGL045W	0.041	0.905	0.0395	0.815	0.042	0.3805
YGL046W	0.039	0.612	0.041	1.063	0.039	0.25
YGL049C	0.053	0.968	0.05	0.993	0.051	0.685
YGL050W	0.048	0.862	0.049	1.015	0.05	0.727
YGL051W	0.049	0.83	0.051	1.109	0.051	0.711
YGL053W	0.046	0.818	0.049	1.092	0.048	0.695
YGL054C	0.049	0.574	0.053	1.03	0.049	0.406
YGL056C	0.048	0.949	0.052	1.167	0.049	0.812
YGL057C	0.047	0.771	0.048	1.087	0.05	0.818
YGL058W	0.047	0.093	0.047	0.118	0.045	0.06
YGL059W	0.044	0.717	0.048	1.106	0.046	0.601
YGL060W	0.043	0.662	0.049	0.924	0.045	0.557
YGL062W	0.047	0.965	0.044	1.09	0.044	0.793
YGL063W	0.042	0.848	0.042	1.079	0.042	0.779
YGL064C	0.041	0.251	0.043	0.769	0.041	0.376
YGL066W	0.041	0.344	0.039	0.414	0.042	0.103
YGL067W	0.044	0.95	0.045	1.192	0.042	0.829
YGL070C	0.04	0.054	0.039	0.088	0.039	0.056
YGL071W	0.041	0.796	0.043	0.171	0.04	0.063
YGL072C	0.039	0.19	0.051	0.418	0.04	0.173
YGL076C	0.043	0.149	0.045	0.308	0.043	0.161
YGL077C	0.045	0.929	0.042	1.139	0.042	0.757
YGL078C	0.042	0.557	0.041	0.835	0.043	0.473
YGL079W	0.044	0.96	0.042	1.161	0.044	0.857
YGL080W	0.04	0.452	0.043	0.987	0.042	0.212
YGL081W	0.0395	0.8125	0.04	0.849	0.0385	0.346
YGL082W	0.038	0.748	0.04	1.053	0.038	0.362
YGL083W	0.039	0.805	0.043	1.142	0.04	0.705
YGL084C	0.038	0.418	0.041	0.965	0.042	0.361
YGL085W	0.047	1.013	0.047	1.122	0.051	0.821
YGL086W	0.045	0.974	0.049	1.119	0.046	0.735
YGL087C	0.044	0.98	0.044	1.165	0.044	0.9
YGL088W	0.043	0.532	0.046	0.741	0.042	0.306
YGL089C	0.044	0.962	0.043	1.118	0.045	0.695
YGL090W	0.047	1.01	0.04	1.142	0.047	0.788
YGL094C	0.041	0.882	0.041	1.119	0.043	0.755
YGL095C	0.04	0.404	0.04	0.424	0.041	0.196
YGL096W	0.042	0.909	0.041	0.907	0.042	0.495
YGL100w	0.04	0.735	0.038	0.372	0.038	0.127
YGL101W	0.0415	0.9275	0.0455	0.858	0.039	0.2435
YGL104C	0.0395	0.8535	0.039	0.633	0.0395	0.248
YGL105W	0.042	0.414	0.04	0.251	0.04	0.102
YGL107C	0.045	0.69	0.039	0.399	0.04	0.135
YGL108C	0.044	0.951	0.043	0.888	0.044	0.277
YGL109W	0.048	0.9	0.043	0.8	0.048	0.332
YGL110C	0.044	0.972	0.04	0.739	0.04	0.216
YGL114W	0.039	0.831	0.039	1.047	0.041	0.411
YGL115W	0.038	0.291	0.038	0.138	0.04	0.066
YGL117W	0.04	0.98	0.039	1.055	0.041	0.378
YGL118C	0.039	0.918	0.038	0.694	0.039	0.215
YGL119w	0.042	0.735	0.037	0.41	0.039	0.145
YGL121C	0.042	0.937	0.043	0.972	0.045	0.383
YGL124C	0.041	0.812	0.044	0.859	0.041	0.218
YGL125W	0.038	0.902	0.039	0.413	0.038	0.1725
YGL126W	0.041	0.846	0.041	0.966	0.042	0.301
YGL127C	0.042	0.711	0.041	0.665	0.043	0.292
YGL129C	0.041	0.186	0.04	0.123	0.04	0.155
YGL131C	0.042	0.77	0.039	0.664	0.047	0.166
YGL132W	0.041	0.875	0.048	1.086	0.041	0.192
YGL133W	0.041	0.83	0.042	0.848	0.044	0.341
YGL134w	0.042	0.93	0.038	0.601	0.04	0.19
YGL135W	0.04	0.144	0.038	0.117	0.038	0.093
YGL136C	0.039	0.835	0.04	0.837	0.04	0.278
YGL138C	0.04	0.956	0.04	1.111	0.042	0.388
YGL139W	0.044	0.976	0.041	1.101	0.04	0.439
YGL140C	0.038	0.925	0.043	1.032	0.042	0.402
YGL141W	0.039	0.948	0.038	0.959	0.039	0.449
YGL143C	0.04	0.069	0.038	0.065	0.039	0.064
YGL144C	0.037	0.709	0.038	0.552	0.038	0.108
YGL146C	0.057	1.022	0.05	1	0.05	0.287
YGL147C	0.056	0.69	0.049	0.629	0.052	0.294
YGL148W	0.04	0.72	0.042	0.741	0.039	0.295
YGL149W	0.049	0.864	0.049	0.955	0.049	0.32
YGL151W	0.052	0.942	0.052	0.782	0.05	0.435
YGL152C	0.048	0.922	0.046	0.923	0.047	0.423
YGL153W	0.046	0.835	0.048	0.853	0.044	0.231
YGL154C	0.039	0.873	0.042	0.762	0.039	0.269
YGL156W	0.044	0.663	0.044	0.392	0.046	0.096
YGL157W	0.046	0.921	0.045	0.722	0.048	0.317
YGL158W	0.044	1.038	0.045	1	0.043	0.294
YGL159W	0.045	0.977	0.042	1.015	0.043	0.366
YGL160W	0.044	0.999	0.044	1.067	0.044	0.598
YGL161C	0.042	0.964	0.042	0.841	0.041	0.307
YGL162W	0.041	0.916	0.044	0.927	0.042	0.326
YGL163C	0.043	0.518	0.041	0.176	0.041	0.086
YGL164C	0.042	0.925	0.042	1.089	0.044	0.677
YGL165C	0.04	0.843	0.039	0.614	0.04	0.202
YGL166W	0.04	0.869	0.04	0.623	0.04	0.263
YGL167C	0.039	0.258	0.039	0.066	0.04	0.049
YGL168W	0.039	0.233	0.04	0.073	0.04	0.048
YGL170C	0.046	1.033	0.043	1.087	0.045	0.561
YGL173C	0.038	0.375	0.042	0.177	0.038	0.088
YGL174W	0.036	0.133	0.0365	0.142	0.0395	0.0855
YGL175C	0.04	0.907	0.039	0.808	0.047	0.645
YGL176C	0.046	0.928	0.042	1.115	0.04	0.291
YGL177W	0.039	0.893	0.039	0.718	0.038	0.184
YGL178w	0.039	0.831	0.036	0.512	0.039	0.185
YGL179C	0.038	0.791	0.038	0.623	0.04	0.137
YGL180W	0.039	0.835	0.037	0.569	0.039	0.124
YGL181W	0.041	0.94	0.042	1.015	0.042	0.381
YGL184c	0.038	0.872	0.039	0.405	0.04	0.239
YGL185c	0.041	0.832	0.039	0.355	0.041	0.266
YGL186C	0.042	0.276	0.041	0.177	0.042	0.206
YGL188c-A	0.041	0.735	0.04	0.498	0.041	0.175
YGL190c	0.04	0.188	0.042	0.212	0.04	0.107
YGL191w	0.04	0.849	0.041	0.273	0.042	0.248
YGL192w	0.043	0.812	0.041	0.332	0.045	0.489
YGL194C	0.044	0.605	0.048	0.491	0.049	0.18
YGL195W	0.043	0.699	0.047	0.619	0.048	0.277
YGL196W	0.041	0.8065	0.043	0.6305	0.0415	0.252
YGL197W	0.044	0.525	0.048	0.595	0.047	0.335
YGL198W	0.041	0.621	0.045	0.66	0.045	0.296
YGL199C	0.0385	0.903	0.042	0.8905	0.043	0.396
YGL200C	0.041	0.537	0.043	0.629	0.047	0.428
YGL202W	0.0385	0.571	0.041	0.567	0.041	0.2435
YGL203C	0.041	0.467	0.041	0.445	0.045	0.247
YGL205W	0.042	0.608	0.043	0.53	0.043	0.112
YGL206C	0.042	0.063	0.04	0.057	0.042	0.044
YGL208W	0.04	0.705	0.044	0.572	0.044	0.355
YGL209W	0.042	0.668	0.042	0.596	0.043	0.376
YGL210W	0.04	0.633	0.042	0.621	0.045	0.47
YGL211W	0.038	0.2685	0.0405	0.2385	0.0385	0.1775
YGL212W	0.039	0.236	0.042	0.215	0.044	0.132
YGL213C	0.038	0.313	0.042	0.299	0.046	0.122
YGL214W	0.037	0.711	0.0425	0.6275	0.042	0.1385
YGL215W	0.038	0.264	0.037	0.239	0.039	0.097
YGL216w	0.055	0.855	0.04	0.3305	0.0395	0.1605
YGL217C	0.037	0.763	0.0476667	0.829	0.0473333	0.411
YGL218W	0.0425	0.0945	0.044	0.1	0.042	0.082
YGL219C	0.044	0.299	0.048	0.231	0.045	0.134
YGL220W	0.042	0.665	0.046	0.485	0.047	0.328
YGL221C	0.042	0.616	0.043	0.468	0.045	0.264
YGL222C	0.043	0.627	0.045	0.56	0.049	0.256
YGL223C	0.04	0.308	0.045	0.304	0.044	0.17
YGL224C	0.04	0.911	0.0455	0.7505	0.04	0.3735
YGL226C-A	0.04	0.602	0.044	0.615	0.044	0.279
YGL226W	0.039	0.382	0.042	0.403	0.042	0.164
YGL227W	0.039	0.342	0.04	0.26	0.041	0.106
YGL228W	0.041	0.523	0.045	0.334	0.047	0.165
YGL229C	0.043	0.679	0.043	0.565	0.048	0.415
YGL230C	0.042	0.795	0.046	0.676	0.051	0.421
YGL231C	0.042	0.825	0.049	0.676	0.046	0.364
YGL232W	0.04	0.547	0.042	0.47	0.041	0.186
YGL234W	0.038	0.507	0.043	0.527	0.041	0.196
YGL235W	0.039	0.916	0.0455	0.88	0.045	0.5335
YGL236C	0.038	0.535	0.042	0.526	0.041	0.227
YGL237C	0.0375	0.6335	0.039	0.4105	0.038	0.1945
YGL240W	0.037	0.056	0.039	0.06	0.038	0.054
YGL241W	0.04	0.615	0.041	0.621	0.042	0.398
YGL242C	0.05	0.717	0.055	0.478	0.059	0.296
YGL243W	0.051	0.757	0.056	0.605	0.056	0.353
YGL244W	0.049	0.122	0.051	0.077	0.051	0.059
YGL246C	0.048	0.1	0.055	0.117	0.055	0.082
YGL248W	0.047	0.645	0.052	0.674	0.054	0.608
YGL249W	0.046	0.524	0.049	0.557	0.05	0.318
YGL250W	0.046	0.108	0.048	0.116	0.048	0.068
YGL251C	0.047	0.469	0.049	0.472	0.048	0.264
YGL252C	0.043	0.095	0.045	0.067	0.045	0.053
YGL253W	0.054	0.736	0.05	0.505	0.052	0.387
YGL254W	0.046	0.784	0.047	0.646	0.048	0.428
YGL255W	0.047	0.8	0.048	0.668	0.046	0.578
YGL256W	0.044	0.698	0.045	0.565	0.044	0.329
YGL257C	0.042	0.612	0.045	0.465	0.045	0.267
YGL258W	0.041	0.695	0.045	0.624	0.045	0.301
YGL259W	0.042	0.694	0.048	0.706	0.051	0.681
YGL260W	0.041	0.657	0.045	0.629	0.043	0.374
YGL261C	0.041	0.583	0.044	0.59	0.043	0.293
YGL262W	0.042	0.596	0.045	0.639	0.041	0.207
YGL263W	0.041	0.529	0.043	0.49	0.04	0.137
YGR001C	0.04	0.516	0.04	0.37	0.04	0.099
YGR003W	0.044	0.783	0.045	0.582	0.046	0.307
YGR004W	0.044	0.706	0.044	0.464	0.042	0.425
YGR006W	0.04	0.042	0.042	0.044	0.038	0.04
YGR007W	0.04	0.643	0.044	0.604	0.041	0.242
YGR008C	0.041	0.715	0.043	0.599	0.042	0.424
YGR010W	0.039	0.646	0.042	0.642	0.04	0.291
YGR011W	0.0425	0.9175	0.0426667	0.558333	0.0433333	0.312667
YGR012W	0.039	0.423	0.042	0.366	0.037	0.137
YGR014W	0.045	0.77	0.051	0.731	0.043	0.334
YGR015C	0.047	0.861	0.048	0.676	0.045	0.193
YGR016W	0.046	0.785	0.046	0.555	0.045	0.404
YGR017W	0.045	0.739	0.047	0.517	0.043	0.326
YGR018C	0.042	0.877	0.042	0.709	0.0445	0.46
YGR019W	0.044	0.776	0.046	0.665	0.044	0.274
YGR020C	0.039	0.053	0.044	0.042	0.042	0.04
YGR021W	0.044	0.722	0.051	0.59	0.039	0.152
YGR022C	0.041	0.8565	0.042	0.6835	0.042	0.288
YGR023W	0.041	0.625	0.044	0.614	0.04	0.179
YGR025W	0.044	0.901	0.0435	0.6485	0.043	0.391
YGR026W	0.047	0.811	0.049	0.753	0.043	0.2
YGR027C	0.055	0.617	0.052	0.405	0.054	0.157
YGR028W	0.044	0.896	0.042	0.742	0.04	0.373
YGR031W	0.051	0.883	0.047	0.51	0.045	0.145
YGR032W	0.047	0.849	0.043	0.393	0.046	0.255
YGR033C	0.054	0.902	0.046	0.584	0.048	0.189
YGR034W	0.049	0.694	0.044	0.417	0.048	0.171
YGR035C	0.048	0.879	0.041	0.265	0.043	0.14
YGR035w-A	0.044	0.736	0.043	0.636	0.042	0.191
YGR036C	0.045	0.088	0.041	0.078	0.04	0.048
YGR037C	0.047	0.596	0.0405	0.2235	0.0395	0.1015
YGR038W	0.045	0.912	0.041	0.539	0.051	0.252
YGR039W	0.056	0.982	0.047	0.727	0.047	0.466
YGR040W	0.044	0.868	0.038	0.367	0.044	0.213
YGR041W	0.047	0.912	0.045	0.688	0.042	0.216
YGR042W	0.048	0.878	0.043	0.622	0.044	0.22
YGR043C	0.054	0.932	0.045	0.598	0.046	0.288
YGR044C	0.05	0.93	0.044	0.605	0.043	0.25
YGR045C	0.051	0.897	0.043	0.537	0.046	0.192
YGR049W	0.039	0.674	0.041	0.517	0.044	0.182
YGR050C	0.055	0.893	0.042	0.393	0.052	0.329
YGR051C	0.055	0.928	0.049	0.66	0.055	0.295
YGR052W	0.049	0.959	0.048	0.673	0.05	0.314
YGR053C	0.044	0.795	0.049	0.706	0.048	0.161
YGR054W	0.054	0.889	0.047	0.404	0.049	0.173
YGR055W	0.05	0.884	0.046	0.519	0.044	0.219
YGR056W	0.045	0.52	0.045	0.126	0.043	0.054
YGR057C	0.049	0.862	0.044	0.449	0.045	0.171
YGR058W	0.046	0.767	0.044	0.492	0.044	0.128
YGR059W	0.046	0.88	0.041	0.285	0.043	0.172
YGR061C	0.042	0.612	0.041	0.333	0.04	0.117
YGR062C	0.043	0.291	0.043	0.218	0.0415	0.1185
YGR063C	0.043	0.533	0.044	0.359	0.044	0.103
YGR064W	0.045	0.788	0.043	0.485	0.044	0.195
YGR066C	0.046	0.928	0.044	0.784	0.041	0.353
YGR067C	0.047	0.945	0.046	0.652	0.042	0.33
YGR068C	0.046	0.934	0.045	0.669	0.042	0.238
YGR069W	0.048	0.934	0.044	0.636	0.044	0.353
YGR070W	0.044	0.892	0.043	0.635	0.041	0.2
YGR071C	0.039	0.415	0.039	0.187	0.04	0.083
YGR072W	0.04	0.669	0.044	0.47	0.04	0.071
YGR076C	0.056	0.762	0.055	0.48	0.056	0.262
YGR077C	0.062	0.987	0.058	0.749	0.057	0.367
YGR078C	0.057	0.599	0.057	0.4	0.056	0.183
YGR079W	0.056	0.936	0.056	0.63	0.057	0.357
YGR080W	0.058	0.97	0.052	0.654	0.056	0.485
YGR081C	0.057	0.717	0.055	0.489	0.055	0.34
YGR084C	0.05	0.795	0.048	0.602	0.049	0.245
YGR085C	0.054	0.574	0.051	0.374	0.047	0.133
YGR086C	0.041	0.728	0.048	0.431	0.045	0.16
YGR087C	0.055	0.948	0.05	0.71	0.054	0.42
YGR088W	0.054	0.945	0.051	0.742	0.051	0.335
YGR089W	0.042	0.794	0.042	0.371	0.039	0.124
YGR092W	0.041	0.129	0.044	0.098	0.049	0.05
YGR093W	0.045	0.832	0.046	0.613	0.048	0.164
YGR096W	0.047	0.903	0.045	0.644	0.045	0.247
YGR097W	0.047	0.867	0.045	0.459	0.048	0.155
YGR100W	0.049	0.865	0.048	0.622	0.051	0.316
YGR101W	0.046	0.263	0.042	0.183	0.044	0.13
YGR102C	0.047	0.508	0.042	0.268	0.045	0.14
YGR104C	0.045	0.263	0.039	0.067	0.043	0.052
YGR105W	0.049	0.074	0.041	0.039	0.042	0.041
YGR106C	0.042	0.652	0.042	0.357	0.044	0.099
YGR107W	0.046	0.831	0.043	0.631	0.043	0.388
YGR108W	0.043	0.76	0.044	0.645	0.043	0.231
YGR109C	0.046	0.843	0.044	0.619	0.045	0.213
YGR110W	0.045	0.842	0.042	0.364	0.045	0.162
YGR111W	0.062	1.003	0.054	0.742	0.06	0.578
YGR112W	0.048	0.55	0.046	0.299	0.046	0.111
YGR117C	0.043	0.782	0.042	0.323	0.062	0.168
YGR118W	0.057	0.705	0.051	0.496	0.048	0.248
YGR121C	0.05	0.861	0.048	0.627	0.044	0.209
YGR121w-A	0.046	0.926	0.043	0.927	0.038	0.347
YGR122C-A	0.043	0.908	0.04	0.34	0.042	0.613
YGR122W	0.05	0.882	0.051	0.555	0.048	0.111
YGR123C	0.046	0.797	0.049	0.601	0.048	0.21
YGR124W	0.044	0.839	0.047	0.636	0.046	0.194
YGR125W	0.046	0.843	0.048	0.648	0.046	0.194
YGR126W	0.044	0.794	0.045	0.556	0.047	0.243
YGR127W	0.045	0.82	0.048	0.77	0.049	0.424
YGR129W	0.049	0.898	0.05	0.677	0.047	0.329
YGR130C	0.043	0.872	0.05	0.725	0.051	0.691
YGR131W	0.044	0.898	0.048	0.663	0.045	0.288
YGR132C	0.043	0.865	0.048	0.695	0.047	0.405
YGR133W	0.044	0.833	0.047	0.663	0.046	0.32
YGR134W	0.041	0.81	0.042	0.839	0.042	0.384
YGR135W	0.045	0.675	0.047	0.29	0.046	0.144
YGR136W	0.05	0.95	0.046	0.69	0.05	0.395
YGR137W	0.046	0.878	0.043	0.566	0.043	0.315
YGR138C	0.044	0.819	0.043	0.611	0.042	0.233
YGR139W	0.048	0.895	0.047	0.765	0.046	0.392
YGR141W	0.044	0.817	0.046	0.582	0.044	0.219
YGR142W	0.045	0.869	0.046	0.642	0.042	0.249
YGR143W	0.042	0.833	0.041	0.549	0.04	0.168
YGR144W	0.047	0.913	0.046	0.642	0.04	0.299
YGR146C	0.047	0.94	0.046	0.572	0.043	0.33
YGR146c-A	0.044	0.922	0.039	0.886	0.037	0.346
YGR148C	0.044	0.696	0.045	0.295	0.044	0.167
YGR149W	0.044	0.806	0.045	0.481	0.044	0.265
YGR150C	0.045	0.633	0.043	0.232	0.044	0.132
YGR151C	0.044	0.766	0.043	0.549	0.042	0.169
YGR152C	0.048	0.834	0.043	0.446	0.048	0.233
YGR153W	0.047	0.894	0.049	0.734	0.048	0.319
YGR154C	0.045	0.835	0.046	0.711	0.044	0.26
YGR155W	0.044	0.053	0.042	0.057	0.04	0.059
YGR157W	0.045	0.643	0.05	0.602	0.045	0.322
YGR159C	0.046	0.178	0.043	0.081	0.043	0.084
YGR160W	0.043	0.228	0.043	0.085	0.041	0.079
YGR161C	0.044	0.859	0.042	0.531	0.041	0.205
YGR161W-C	0.038	0.832	0.041	0.748	0.036	0.204
YGR162W	0.047	0.186	0.044	0.129	0.042	0.137
YGR163W	0.044	0.802	0.046	0.655	0.043	0.267
YGR164W	0.04	0.662	0.04	0.265	0.041	0.209
YGR165W	0.046	0.306	0.045	0.21	0.042	0.13
YGR166W	0.044	0.849	0.045	0.606	0.042	0.215
YGR167W	0.041	0.742	0.042	0.417	0.039	0.171
YGR168C	0.042	0.748	0.044	0.618	0.044	0.252
YGR169C	0.043	0.783	0.045	0.577	0.043	0.214
YGR169c-A	0.041	0.903	0.039	0.88	0.037	0.245
YGR170W	0.042	0.738	0.043	0.515	0.044	0.179
YGR171C	0.054	0.726	0.054	0.422	0.054	0.144
YGR173W	0.053	0.838	0.054	0.635	0.05	0.189
YGR174C	0.051	0.761	0.05	0.486	0.05	0.171
YGR174w-A	0.041	0.768	0.04	0.498	0.037	0.128
YGR176W	0.053	0.886	0.052	0.65	0.053	0.274
YGR177C	0.049	0.865	0.051	0.636	0.049	0.262
YGR178C	0.049	0.774	0.052	0.592	0.052	0.304
YGR180C	0.047	0.642	0.043	0.213	0.0425	0.101
YGR181W	0.047	0.84	0.049	0.588	0.045	0.181
YGR182C	0.05	0.885	0.052	0.662	0.052	0.28
YGR183C	0.05	0.943	0.048	0.713	0.046	0.241
YGR184C	0.057	0.821	0.048	0.721	0.044	0.366
YGR187C	0.046	0.793	0.046	0.609	0.043	0.179
YGR188C	0.047	0.387	0.046	0.159	0.049	0.081
YGR189C	0.046	0.834	0.046	0.623	0.044	0.305
YGR192C	0.046	0.771	0.052	0.569	0.042	0.186
YGR193C	0.046	0.925	0.047	0.72	0.042	0.313
YGR194C	0.046	0.904	0.051	0.757	0.044	0.376
YGR196C	0.047	0.844	0.046	0.581	0.043	0.203
YGR197C	0.048	0.855	0.045	0.717	0.041	0.166
YGR199W	0.044	0.831	0.042	0.722	0.044	0.31
YGR200C	0.043	0.525	0.04	0.125	0.039	0.061
YGR201C	0.043	0.913	0.042	0.81	0.042	0.444
YGR202C	0.043	0.839	0.045	0.76	0.039	0.26
YGR203W	0.043	0.866	0.046	0.729	0.042	0.273
YGR204c-A	0.043	0.903	0.041	0.89	0.037	0.261
YGR204W	0.042	0.796	0.04	0.414	0.042	0.232
YGR205W	0.044	0.843	0.047	0.729	0.039	0.248
YGR206W	0.045	0.915	0.05	0.74	0.044	0.226
YGR207C	0.056	0.963	0.056	0.835	0.048	0.389
YGR208W	0.049	0.057	0.053	0.048	0.046	0.043
YGR209C	0.054	0.965	0.064	0.929	0.045	0.314
YGR210C	0.042	0.884	0.04	0.883	0.041	0.613
YGR212W	0.05	0.917	0.045	0.625	0.044	0.354
YGR213C	0.054	0.88	0.048	0.752	0.044	0.265
YGR214W	0.051	0.588	0.05	0.418	0.042	0.267
YGR215W	0.045	0.384	0.045	0.273	0.042	0.119
YGR217W	0.047	0.893	0.049	0.732	0.042	0.252
YGR219W	0.041	0.564	0.041	0.3	0.041	0.167
YGR220C	0.041	0.538	0.04	0.383	0.042	0.339
YGR221C	0.049	0.939	0.041	0.809	0.042	0.49
YGR222W	0.053	0.561	0.042	0.254	0.041	0.177
YGR223C	0.049	0.919	0.04	0.35	0.041	0.195
YGR224W	0.044	0.845	0.042	0.686	0.042	0.374
YGR225W	0.045	0.902	0.039	0.7345	0.039	0.341
YGR226C	0.045	0.858	0.041	0.703	0.042	0.386
YGR227W	0.047	0.893	0.043	0.727	0.038	0.389
YGR228W	0.051	0.928	0.04	0.656	0.038	0.312
YGR229C	0.045	0.777	0.039	0.145	0.04	0.089
YGR230W	0.045	0.929	0.045	0.835	0.041	0.492
YGR231C	0.043	0.889	0.042	0.758	0.043	0.443
YGR232W	0.042	0.924	0.039	0.791	0.041	0.411
YGR233C	0.042	0.839	0.04	0.384	0.04	0.216
YGR234W	0.048	0.96	0.04	0.805	0.038	0.473
YGR235C	0.046	0.942	0.04	0.716	0.039	0.367
YGR236C	0.042	0.894	0.04	0.528	0.039	0.278
YGR237C	0.041	0.763	0.04	0.553	0.039	0.31
YGR238C	0.048	0.834	0.045	0.322	0.05	0.177
YGR239C	0.044	0.808	0.048	0.797	0.047	0.205
YGR240C	0.051	0.69	0.041	0.179	0.04	0.106
YGR241C	0.051	0.96	0.04	0.819	0.04	0.376
YGR242W	0.045	0.929	0.04	0.817	0.04	0.371
YGR243W	0.043	0.917	0.039	0.757	0.04	0.351
YGR244C	0.046	0.945	0.0445	0.86	0.044	0.408
YGR247W	0.057	0.96	0.042	0.839	0.04	0.449
YGR248W	0.04	0.788	0.045	0.79	0.045	0.208
YGR249W	0.046	0.919	0.04	0.717	0.04	0.364
YGR250C	0.044	0.785	0.049	0.596	0.05	0.203
YGR252W	0.041	0.333	0.038	0.147	0.042	0.263
YGR254W	0.04	0.829	0.037	0.408	0.041	0.694
YGR255C	0.04	0.386	0.036	0.184	0.04	0.263
YGR256W	0.046	0.923	0.043	0.912	0.044	0.301
YGR257C	0.038	0.122	0.035	0.099	0.039	0.11
YGR258C	0.043	0.931	0.036	0.745	0.042	0.816
YGR259C	0.047	0.861	0.044	0.875	0.043	0.237
YGR260W	0.049	0.904	0.042	0.711	0.045	0.287
YGR261C	0.043	0.216	0.04	0.143	0.043	0.109
YGR262C	0.04	0.049	0.04	0.048	0.041	0.052
YGR263C	0.045	0.846	0.041	0.562	0.043	0.284
YGR266W	0.043	0.952	0.042	0.885	0.04	0.221
YGR268C	0.041	0.914	0.045	0.929	0.041	0.195
YGR269W	0.045	0.966	0.043	0.892	0.041	0.497
YGR270W	0.045	0.922	0.044	0.871	0.041	0.501
YGR271c-A	0.043	0.933	0.04	0.833	0.037	0.267
YGR271W	0.048	0.949	0.037	0.833	0.042	0.448
YGR272C	0.043	0.066	0.041	0.116	0.044	0.148
YGR273C	0.044	0.889	0.036	0.66	0.044	0.639
YGR275W	0.045	0.955	0.043	0.766	0.042	0.341
YGR276C	0.042	0.794	0.037	0.376	0.039	0.446
YGR279C	0.047	0.951	0.043	0.887	0.04	0.216
YGR281W	0.045	0.887	0.042	0.844	0.04	0.36
YGR282C	0.045	0.93	0.044	0.899	0.041	0.558
YGR283C	0.051	0.93	0.041	0.828	0.041	0.399
YGR284C	0.048	0.954	0.043	0.747	0.043	0.305
YGR285C	0.043	0.163	0.04	0.105	0.042	0.118
YGR286C	0.047	0.959	0.041	0.638	0.044	0.357
YGR287C	0.045	0.93	0.041	0.685	0.043	0.362
YGR288W	0.043	0.955	0.041	0.613	0.044	0.335
YGR289C	0.046	0.756	0.036	0.26	0.041	0.127
YGR290W	0.046	0.963	0.039	0.779	0.038	0.393
YGR291C	0.042	0.859	0.036	0.44	0.042	0.349
YGR292W	0.042	0.82	0.041	0.24	0.042	0.119
YGR295C	0.045	0.867	0.046	0.731	0.049	0.8
YHL001W	0.041	0.679	0.043	0.347	0.043	0.332
YHL002W	0.042	0.923	0.04	0.756	0.04	0.424
YHL003C	0.043	1.013	0.046	0.68	0.039	0.079
YHL004W	0.041	0.261	0.041	0.266	0.043	0.142
YHL005C	0.038	0.754	0.04	0.16	0.037	0.082
YHL006C	0.037	0.961	0.044	0.759	0.036	0.093
YHL007C	0.038	0.856	0.055	0.861	0.037	0.085
YHL008C	0.038	0.942	0.05	0.902	0.036	0.12
YHL009C	0.036	0.708	0.051	0.761	0.036	0.072
YHL010C	0.037	0.984	0.053	0.927	0.046	0.08
YHL011C	0.044	0.198	0.042	0.122	0.042	0.094
YHL012W	0.036	0.944	0.044	0.765	0.036	0.086
YHL013C	0.037	0.947	0.044	0.768	0.037	0.118
YHL014C	0.038	0.909	0.051	0.901	0.037	0.098
YHL015w-A	0.045	0.934	0.041	0.828	0.038	0.317
YHL016C	0.041	1.031	0.044	0.799	0.041	0.146
YHL017W	0.043	0.99	0.044	0.697	0.04	0.126
YHL019C	0.038	0.868	0.048	0.912	0.038	0.111
YHL020C	0.039	0.785	0.051	0.883	0.038	0.057
YHL021C	0.041	0.946	0.055	0.907	0.037	0.1
YHL022C	0.037	0.934	0.052	0.918	0.037	0.108
YHL023C	0.039	0.063	0.049	0.432	0.038	0.045
YHL024W	0.042	0.908	0.04	0.869	0.041	0.522
YHL025W	0.044	0.059	0.041	0.064	0.043	0.086
YHL026C	0.042	1.016	0.052	0.937	0.042	0.121
YHL027W	0.044	1.042	0.049	0.767	0.039	0.111
YHL028W	0.045	1.028	0.043	0.824	0.048	0.419
YHL029C	0.038	0.976	0.043	0.89	0.037	0.22
YHL030W	0.041	1.005	0.04	0.926	0.037	0.114
YHL031C	0.038	0.754	0.047	0.67	0.037	0.066
YHL032C	0.038	0.956	0.043	0.916	0.037	0.122
YHL033C	0.039	0.588	0.052	0.759	0.036	0.069
YHL034C	0.038	0.776	0.049	0.866	0.036	0.104
[truncated: 2,876 more rows]
