# Supplementary material for: Revelation of molecular basis for chromium toxicity by phenotypes of Saccharomyces cerevisiae gene deletion mutants
Source: Royal Society of Chemistry journal article supplement (doi:10.1039/c6mt00039h), 2016-01-01
Supplement: c6mt00039h2.xlsx [file c6mt00039h2.xlsx]

## Sheet: Sheet1
ORF	Standard name	Functional description
YLL043W	FPS1	Aquaglyceroporin, plasma membrane channel
YPL274W	SAM3	High-affinity S-adenosylmethionine permease
YHR178W	STB5	Transcription factor; involved in regulating multidrug resistance and oxidative stress response
YMR192W	GYL1	Putative GTPase activating protein (GAP) with a role in exocytosis
YNL196C	SLZ1	Sporulation-specific protein with a leucine zipper motif
YMR275C	BUL1	Ubiquitin-binding component of the Rsp5p E3-ubiquitin ligase complex
YMR180C	CTL1	RNA 5'-triphosphatase, localizes to both the nucleus and cytoplasm
YNL098C	RAS2	GTP-binding protein; regulates nitrogen starvation response, sporulation, and filamentous growth
YPR070W	MED1	Subunit of the RNA polymerase II mediator complex
YMR097C	MTG1	Putative GTPase peripheral to the mitochondrial inner membrane
YPR059C	YPR059C	Dubious open reading frame
YOR036W	PEP12	Target membrane receptor (t-SNARE); for vesicular intermediates traveling between the Golgi apparatus and the vacuole
YNR052C	POP2	RNase of the DEDD superfamily; subunit of the Ccr4-Not complex that mediates 3' to 5' mRNA deadenylation
YMR312W	ELP6	Subunit of hexameric RecA-like ATPase Elp456 Elongator subcomplex; which is required for modification of wobble nucleosides in tRNA
YBR278W	DPB3	Third-largest subunit of DNA polymerase II (DNA polymerase epsilon)
YFL007W	BLM10	Proteasome activator; binds the core proteasome (CP) and stimulates proteasome-mediated protein degradation by inducing gate opening
YPR150W	YPR150W	Dubious open reading frame
YHR154W	RTT107	Protein implicated in Mms22-dependent DNA repair during S phase; involved in recruiting the SMC5/6 complex to double-strand breaks
YKR074W	AIM29	Putative protein of unknown function
YLR312C-B	YLR312C-B	Merged open reading frame
YHR021C	RPS27B	Protein component of the small (40S) ribosomal subunit
YGL168W	HUR1	Protein of unknown function
YDL068W	YDL068W	Dubious open reading frame
YER032W	FIR1	Protein involved in 3' mRNA processing; interacts with Ref2p; APCC(Cdh1) substrate; potential Cdc28p substrate
YDR442W	YDR442W	Dubious open reading frame
YDR477W	SNF1	AMP-activated serine/threonine protein kinase; found in a complex containing Snf4p and members of the Sip1p/Sip2p/Gal83p family
YFL015C	YFL015C	Dubious open reading frame
YFL020C	PAU5	Member of the seripauperin multigene family
YMR216C	SKY1	SR protein kinase (SRPK); involved in regulating proteins involved in mRNA metabolism and cation homeostasis
YOR308C	SNU66	Component of the U4/U6.U5 snRNP complex; involved in pre-mRNA splicing via spliceosome
YML024W	RPS17A	Ribosomal protein 51 (rp51) of the small (40s) subunit
YNL119W	NCS2	Protein required for uridine thiolation of Lys(UUU) and Glu(UUC) tRNAs
YMR263W	SAP30	Component of Rpd3L histone deacetylase complex; involved in silencing at telomeres, rDNA, and silent mating-type loci; involved in telomere maintenance
YER065C	ICL1	Isocitrate lyase; catalyzes the formation of succinate and glyoxylate from isocitrate, a key reaction of the glyoxylate cycle
YBR271W	EFM2	S-adenosylmethionine-dependent methyltransferase; seven-beta-strand lysine methyltransferase which dimethylates translation elongation factor EF2 (Eft1p and Eft2p) at lysine 613 and methylates EF3 (Yef3p) at lysine 187
YLR268W	SEC22	R-SNARE protein; assembles into SNARE complex with Bet1p, Bos1p and Sed5p; cycles between the ER and Golgi complex
YML002W	YML002W	Putative protein of unknown function
YPR049C	ATG11	Adapter protein for pexophagy and the Cvt targeting pathway
YOR356W	CIR2	Putative ortholog of human ETF-dH; found in a large supramolecular complex with other mitochondrial dehydrogenases
YPR119W	CLB2	B-type cyclin involved in cell cycle progression
YMR179W	SPT21	Protein with a role in transcriptional silencing
YNL229C	URE2	Nitrogen catabolite repression transcriptional regulator
YLR384C	IKI3	Subunit of Elongator complex; Elongator is required for modification of wobble nucleosides in tRNA
YMR058W	FET3	Ferro-O2-oxidoreductase; multicopper oxidase that oxidizes ferrous (Fe2+) to ferric iron (Fe3+) for subsequent cellular uptake by transmembrane permease Ftr1p
YOR355W	GDS1	Protein of unknown function
YMR156C	TPP1	DNA 3'-phosphatase; functions in repair of endogenous damage of double-stranded DNA, activity is specific for removal of 3' phosphates at strand breaks
YGR104C	SRB5	Subunit of the RNA polymerase II mediator complex
YLR374C	YLR374C	Dubious open reading frame
YNL070W	TOM7	Component of the TOM (translocase of outer membrane) complex
YDL050C	YDL050C	Dubious open reading frame
YIL044C	AGE2	ADP-ribosylation factor (ARF) GTPase activating protein (GAP) effector
YGL173C	XRN1	Evolutionarily-conserved 5'-3' exonuclease; component of cytoplasmic processing (P) bodies involved in mRNA decay
YPR189W	SKI3	Ski complex component and TPR protein; mediates 3'-5' RNA degradation by the cytoplasmic exosome
YDL093W	PMT5	Protein O-mannosyltransferase; transfers mannose residues from dolichyl phosphate-D-mannose to protein serine/threonine residues
YPR174C	YPR174C	Protein of unknown function
YPL258C	THI21	Hydroxymethylpyrimidine (HMP) and HMP-phosphate kinase
YCR044C	PER1	Protein of the endoplasmic reticulum
YHR194W	MDM31	Mitochondrial protein that may have a role in phospholipid metabolism
YOR382W	FIT2	Mannoprotein that is incorporated into the cell wall; involved in the retention of siderophore-iron in the cell wall
YMR228W	MTF1	Mitochondrial RNA polymerase specificity factor; has structural similarity to S-adenosylmethionine-dependent methyltransferases and functional similarity to bacterial sigma-factors
YGL163C	RAD54	DNA-dependent ATPase that stimulates strand exchange; modifies the topology of double-stranded DNA; involved in the recombinational repair of double-strand breaks in DNA during vegetative growth and meiosis
YMR241W	YHM2	Citrate and oxoglutarate carrier protein
YMR282C	AEP2	Mitochondrial protein
YCR063W	BUD31	Component of the SF3b subcomplex of the U2 snRNP; increases efficiency of first and second step pre-mRNA splicing
YML071C	COG8	Component of the conserved oligomeric Golgi complex; a cytosolic tethering complex (Cog1p through Cog8p) that functions in protein trafficking to mediate fusion of transport vesicles to Golgi compartments
YMR116C	ASC1	G-protein beta subunit and guanine dissociation inhibitor for Gpa2p; ortholog of RACK1 that inhibits translation;
YMR299C	DYN3	Dynein light intermediate chain (LIC); localizes with dynein
YCR081W	SRB8	Subunit of the RNA polymerase II mediator complex
YOR164C	GET4	Protein involved in inserting tail-anchored proteins into ER membranes
YPL269W	KAR9	Karyogamy protein; required for correct positioning of the mitotic spindle and for orienting cytoplasmic microtubules
YER056C-A	RPL34A	Ribosomal 60S subunit protein L34A
YMR307W	GAS1	Beta-1,3-glucanosyltransferase; required for cell wall assembly and also has a role in transcriptional silencing
YML032C	RAD52	Protein that stimulates strand exchange; stimulates strand exchange by facilitating Rad51p binding to single-stranded DNA; anneals complementary single-stranded DNA; involved in the repair of double-strand breaks in DNA during vegetative growth and meiosis and UV induced sister chromatid recombination
YER087C-A	YER087C-A	Dubious open reading frame
YEL027W	VMA3	Proteolipid subunit c of the V0 domain of vacuolar H(+)-ATPase; required for vacuolar acidification and important for copper and iron metal ion homeostasis
YMR219W	ESC1	Protein localized to the nuclear periphery; involved in telomeric silencing
YMR286W	MRPL33	Mitochondrial ribosomal protein of the large subunit
YOR270C	VPH1	Subunit a of vacuolar-ATPase V0 domain
YFL043C	YFL043C	Merged open reading frame
YGL167C	PMR1	High affinity Ca2+/Mn2+ P-type ATPase
YMR152W	YIM1	Protein of unknown function
YKR098C	UBP11	Ubiquitin-specific protease; cleaves ubiquitin from ubiquitinated proteins
YFL031W	HAC1	Basic leucine zipper (bZIP) transcription factor (ATF/CREB1 homolog); regulates the unfolded protein response
YFL046W	FMP32	Putative assembly factor for cytochrome c oxidase
YCL061C	MRC1	S-phase checkpoint protein required for DNA replication
YDR363W-A	SEM1	Component of lid subcomplex of 26S proteasome regulatory subunit
YCR077C	PAT1	Deadenylation-dependent mRNA-decapping factor
YFL032W	YFL032W	Dubious open reading frame
YMR150C	IMP1	Catalytic subunit of mitochondrial inner membrane peptidase complex
YDL046W	NPC2	Sterol transport protein and functional homolog of human NPC2/He1
YDR540C	IRC4	Putative protein of unknown function
YFL040W	YFL040W	Putative transporter
YNL219C	ALG9	Mannosyltransferase, involved in N-linked glycosylation
YER020W	GPA2	Nucleotide binding alpha subunit of the heterotrimeric G protein
YFR007W	YFH7	Putative kinase with similarity to the PRK/URK/PANK kinase subfamily
YDL070W	BDF2	Protein involved in transcription initiation
YDL033C	SLM3	tRNA-specific 2-thiouridylase; responsible for 2-thiolation of the wobble base of mitochondrial tRNAs
YER019W	ISC1	Inositol phosphosphingolipid phospholipase C; mitochondrial membrane localized
YER024W	YAT2	Carnitine acetyltransferase
YKR082W	NUP133	Subunit of Nup84p subcomplex of nuclear pore complex (NPC); contributes to nucleocytoplasmic transport, NPC biogenesis; also plays roles in several processes that may require localization of genes or chromosomes at nuclear periphery, including double-strand break repair, transcription and chromatin silencing
YPL161C	BEM4	Protein involved in establishment of cell polarity and bud emergence
YKL113C	RAD27	5' to 3' exonuclease, 5' flap endonuclease; required for Okazaki fragment processing and maturation, for long-patch base-excision repair and large loop repair (LLR), ribonucleotide excision repair
YMR242C	RPL20A	Ribosomal 60S subunit protein L20A
YER033C	ZRG8	Protein of unknown function
YMR154C	RIM13	Calpain-like cysteine protease
YMR193W	MRPL24	Mitochondrial ribosomal protein of the large subunit
YMR151W	YIM2	Dubious open reading frame
YDL059C	RAD59	Protein involved DNA double-strand break repair
YMR205C	PFK2	Beta subunit of heterooctameric phosphofructokinase
YER039C	HVG1	Protein of unknown function
YOR346W	REV1	Deoxycytidyl transferase; involved in repair of abasic sites and adducted guanines in damaged DNA by translesion synthesis (TLS)
YDL089W	NUR1	Protein involved in regulation of mitotic exit
YLR425W	TUS1	Guanine nucleotide exchange factor (GEF) that modulate Rho1p activity; involved in the cell integrity signaling pathway
YKL048C	ELM1	Serine/threonine protein kinase that regulates cellular morphogenesis
YAL026C	DRS2	Trans-golgi network aminophospholipid translocase (flippase)
YER034W	YER034W	Protein of unknown function
YFR010W	UBP6	Ubiquitin-specific protease
YOR347C	PYK2	Pyruvate kinase; appears to be modulated by phosphorylation
YER016W	BIM1	Microtubule plus end-tracking protein; together with Kar9p makes up the cortical microtubule capture site and delays the exit from mitosis when the spindle is oriented abnormally
YDR069C	DOA4	Ubiquitin hydrolase; deubiquitinates intralumenal vesicle (ILVs) cargo proteins; required for recycling ubiquitin from proteasome-bound ubiquitinated intermediates, acts at the late endosome/prevacuolar compartment to recover ubiquitin from ubiquitinated membrane proteins destined for the vacuole
YFR008W	FAR7	Protein involved in recovery from pheromone-induced cell cycle arrest
YOR307C	SLY41	Protein involved in ER-to-Golgi transport
YER074W	RPS24A	Protein component of the small (40S) ribosomal subunit
YER081W	SER3	3-phosphoglycerate dehydrogenase; catalyzes the first step in serine and glycine biosynthesis
YDR048C	YDR048C	Dubious open reading frame
YFL030W	AGX1	Alanine:glyoxylate aminotransferase (AGT); catalyzes the synthesis of glycine from glyoxylate, which is one of three pathways for glycine biosynthesis in yeast
YDL076C	RXT3	Component of the Rpd3L histone deacetylase complex; involved in histone deacetylation; protein abundance increases in response to DNA replication stress
YCR065W	HCM1	Forkhead transcription factor; drives S-phase activation of genes involved in chromosome segregation, spindle dynamics, budding; also activates genes involved in respiration, use of alternative energy sources (like proline), NAD synthesis, oxidative stress resistance
YER030W	CHZ1	Histone chaperone for Htz1p/H2A-H2B dimer; required for the stabilization of the Chz1p-Htz1-H2B complex
YNL199C	GCR2	Transcriptional activator of genes involved in glycolysis; interacts and functions with the DNA-binding protein Gcr1p
YFL006W	YFL006W	Merged open reading frame
YMR190C	SGS1	RecQ family nucleolar DNA helicase; role in genome integrity maintenance, chromosome synapsis, meiotic joint molecule/crossover formation
YOR304C-A	BIL1	Protein that binds Bud6p and has a role in actin cable assembly
YLR286C	CTS1	Endochitinase; required for cell separation after mitosis
YMR121C	RPL15B	Ribosomal 60S subunit protein L15B
YFL001W	DEG1	tRNA:pseudouridine synthase; introduces pseudouridines at position 38 or 39 in tRNA
YKL002W	DID4	Class E Vps protein of the ESCRT-III complex
YER019C-A	SBH2	Ssh1p-Sss1p-Sbh2p complex component
YIL043C	CBR1	Cytochrome b reductase
YER072W	VTC1	Subunit of the vacuolar transporter chaperone (VTC) complex
YFL041W	FET5	Multicopper oxidase; integral membrane protein with similarity to Fet3p; may have a role in iron transport
YGR188C	BUB1	Protein kinase involved in the cell cycle checkpoint into anaphase
YLR398C	SKI2	Ski complex component and putative RNA helicase
YNL068C	FKH2	Forkhead family transcription factor; plays a major role in the expression of G2/M phase genes
YER095W	RAD51	Strand exchange protein; forms a helical filament with DNA that searches for homology; involved in the recombinational repair of double-strand breaks in DNA during vegetative growth and meiosis; homolog of Dmc1p and bacterial RecA protein
YBR277C	YBR277C	Dubious open reading frame
YER084W	YER084W	Protein of unknown function
YCR066W	RAD18	E3 ubiquitin ligase; forms heterodimer with Rad6p to monoubiquitinate PCNA-K164; heterodimer binds single-stranded DNA and has single-stranded DNA dependent ATPase activity
YKR084C	HBS1	GTPase with similarity to translation release factors
YKR001C	VPS1	Dynamin-like GTPase required for vacuolar sorting
YHR141C	RPL42B	Ribosomal 60S subunit protein L42B
YHL005C	YHL005C	Dubious open reading frame
YNL250W	RAD50	Subunit of MRX complex with Mre11p and Xrs2p; complex is involved in processing double-strand DNA breaks in vegetative cells, initiation of meiotic DSBs, telomere maintenance, and nonhomologous end joining; forms nuclear foci upon DNA replication stress
YDL065C	PEX19	Chaperone and import receptor for newly-synthesized class I PMPs
YER075C	PTP3	Phosphotyrosine-specific protein phosphatase; involved in the inactivation of mitogen-activated protein kinase (MAPK) during osmolarity sensing
YPR123C	YPR123C	Dubious open reading frame
YER045C	ACA1	ATF/CREB family basic leucine zipper (bZIP) transcription factor
YIL097W	FYV10	Subunit of GID complex; involved in proteasome-dependent catabolite inactivation of gluconeogenic enzymes FBPase, PEPCK, and c-MDH
YJR102C	VPS25	Component of the ESCRT-II complex
YOR383C	FIT3	Mannoprotein that is incorporated into the cell wall; incorporated via a glycosylphosphatidylinositol (GPI) anchor; involved in the retention of siderophore-iron in the cell wall
YLR148W	PEP3	Component of CORVET membrane tethering complex; vacuolar peripheral membrane protein that promotes vesicular docking/fusion reactions in conjunction with SNARE proteins, required for vacuolar biogenesis
YCR087W	YCR087W	Dubious open reading frame
YDL021W	GPM2	Homolog of Gpm1p phosphoglycerate mutase
YPL101W	ELP4	Subunit of hexameric RecA-like ATPase Elp456 Elongator subcomplex; which is required for modification of wobble nucleosides in tRNA
YDR027C	VPS54	Component of the GARP (Golgi-associated retrograde protein) complex; GARP is required for the recycling of proteins from endosomes to the late Golgi, and for mitosis after DNA damage induced checkpoint arrest
YCR034W	ELO2	Fatty acid elongase, involved in sphingolipid biosynthesis; acts on fatty acids of up to 24 carbons in length; mutations have regulatory effects on 1,3-beta-glucan synthase, vacuolar ATPase, and the secretory pathway
YCR087C-A	YCR087C-A	Putative protein of unknown function
YPR120C	CLB5	B-type cyclin involved in DNA replication during S phase
YHR031C	RRM3	DNA helicase involved in rDNA replication and Ty1 transposition
YOR322C	LDB19	Alpha-arrestin involved in ubiquitin-dependent endocytosis
YER041W	YEN1	Holliday junction resolvase; promotes template switching during break-induced replication (BIR), causing non-reciprocal translocations (NRTs)
YAL021C	CCR4	Component of the CCR4-NOT transcriptional complex; CCR4-NOT is involved in regulation of gene expression
YAL002W	VPS8	Membrane-binding component of the CORVET complex
YPR061C	JID1	Probable Hsp40p co-chaperone
YCR086W	CSM1	Nucleolar protein that mediates homolog segregation during meiosis I
YAL024C	LTE1	Protein similar to GDP/GTP exchange factors
YHR012W	VPS29	Subunit of the membrane-associated retromer complex; endosomal protein; essential for endosome-to-Golgi retrograde transport
YLR417W	VPS36	Component of the ESCRT-II complex
YOR123C	LEO1	Component of the Paf1 complex; which associates with RNA polymerase II and is involved in histone methylation
YER056C	FCY2	Purine-cytosine permease; mediates purine (adenine, guanine, and hypoxanthine) and cytosine accumulation
YGR240C	PFK1	Alpha subunit of heterooctameric phosphofructokinase
YMR123W	PKR1	V-ATPase assembly factor; functions with other V-ATPase assembly factors in the ER to efficiently assemble the V-ATPase membrane sector (V0)
YPL195W	APL5	Delta adaptin-like subunit of the clathrin associated protein complex
YJL092W	SRS2	DNA helicase and DNA-dependent ATPase; involved in DNA repair and checkpoint recovery, needed for proper timing of commitment to meiotic recombination and transition from Meiosis I to II
YJL029C	VPS53	Component of the GARP (Golgi-associated retrograde protein) complex; GARP is required for the recycling of proteins from endosomes to the late Golgi, and for mitosis after DNA damage induced checkpoint arrest
YNL141W	AAH1	Adenine deaminase (adenine aminohydrolase); converts adenine to hypoxanthine
YLR025W	SNF7	One of four subunits of the ESCRT-III complex; involved in the sorting of transmembrane proteins into the multivesicular body (MVB) pathway; recruited from the cytoplasm to endosomal membranes
YDL077C	VAM6	Guanine nucleotide exchange factor for the GTPase Gtr1p; subunit of the HOPS endocytic tethering complex
YER044C-A	MEI4	Meiosis-specific protein involved in forming DSBs; involved in double-strand break (DSBs) formation during meiotic recombination
YDR080W	VPS41	Subunit of the HOPS endocytic tethering complex
YGL071W	AFT1	Transcription factor involved in iron utilization and homeostasis
YPR164W	MMS1	Subunit of E3 ubiquitin ligase complex involved in replication repair; stabilizes protein components of the replication fork such as the fork-pausing complex and leading strand polymerase, preventing fork collapse and promoting efficient recovery during replication stress
YCL008C	STP22	Component of the ESCRT-I complex; ESCRT-I is involved in ubiquitin-dependent sorting of proteins into the endosome
YLR396C	VPS33	ATP-binding protein that is a subunit of the HOPS and CORVET complexes
YER151C	UBP3	Ubiquitin-specific protease involved in transport and osmotic response
YGR229C	SMI1	Protein involved in the regulation of cell wall synthesis
YPL065W	VPS28	Component of the ESCRT-I complex; complex is involved in ubiquitin-dependent sorting of proteins into the endosome
YPL045W	VPS16	Subunit of the HOPS and the CORVET complexes; part of the Class C Vps complex essential for membrane docking and fusion at Golgi-to-endosome and endosome-to-vacuole protein transport stages
YKR035W-A	DID2	Class E protein of the vacuolar protein-sorting (Vps) pathway; binds Vps4p and directs it to dissociate ESCRT-III complexes; forms a functional and physical complex with Ist1p; human ortholog may be altered in breast tumors
YDL080C	THI3	Regulatory protein that binds Pdc2p and Thi2p transcription factors
YPR173C	VPS4	AAA-ATPase involved in multivesicular body (MVB) protein sorting
YPL002C	SNF8	Component of the ESCRT-II complex; ESCRT-II is involved in ubiquitin-dependent sorting of proteins into the endosome
YJL117W	PHO86	Endoplasmic reticulum (ER) resident protein; required for ER exit of the high-affinity phosphate transporter Pho84p, specifically required for packaging of Pho84p into COPII vesicles; protein abundance increases in response to DNA replication stress
YML117W	NAB6	Putative RNA-binding protein; associates with mRNAs encoding cell wall proteins in high-throughput studies
YLR181C	VTA1	Multivesicular body (MVB) protein; involved in endosomal protein sorting; regulates Vps4p activity by promoting its oligomerization
YHR030C	SLT2	Serine/threonine MAP kinase; involved in regulating maintenance of cell wall integrity, cell cycle progression, and nuclear mRNA retention in heat shock;
YJL095W	BCK1	MAPKKK acting in the protein kinase C signaling pathway; the kinase C signaling pathway controls cell integrity
