# Supplementary material for: Revelation of molecular basis for chromium toxicity by phenotypes of Saccharomyces cerevisiae gene deletion mutants
Source: Royal Society of Chemistry journal article supplement (doi:10.1039/c6mt00039h), 2016-01-01
Supplement: c6mt00039h3.xlsx [file c6mt00039h3.xlsx]

## Sheet: Sheet1
ORF	Standard name	Functional description
YLL006W	MMM1	ER integral membrane protein, ERMES complex subunit
YLR091W	GEP5	Protein of unknown function
YBR191W	RPL21A	Ribosomal 60S subunit protein L21A
YIL052C	RPL34B	Ribosomal 60S subunit protein L34B
YBR031W	RPL4A	Ribosomal 60S subunit protein L4A
YML027W	YOX1	Homeobox transcriptional repressor
YLR361C	DCR2	Phosphoesterase; involved in downregulation of the unfolded protein response (UPR)
YJR061W	YJR061W	Putative protein of unknown function; non-essential gene; transcription repressed by Rm101p; YJR061W has a paralog, MNN4, that arose from the whole genome duplication
YKR006C	MRPL13	Mitochondrial ribosomal protein of the large subunit
YJL096W	MRPL49	Mitochondrial ribosomal protein of the large subunit
YJR044C	VPS55	Late endosomal protein involved in late endosome to vacuole transport
YPL092W	SSU1	Plasma membrane sulfite pump involved in sulfite metabolism; required for efficient sulfite efflux; major facilitator superfamily protein
YJR088C	EMC2	Member of conserved ER transmembrane complex
YJR056C	YJR056C	Protein of unknown function
YML041C	VPS71	Nucleosome-binding component of the SWR1 complex; SWR1 exchanges histone variant H2AZ (Htz1p) for chromatin-bound histone H2A; required for vacuolar protein sorting
YPL189W	GUP2	Probable membrane protein; possible role in proton symport of glycerol
YML038C	YMD8	Putative nucleotide sugar transporter; has similarity to Vrg4p
YJR031C	GEA1	Guanine nucleotide exchange factor for ADP ribosylation factors (ARFs); involved in vesicular transport between the Golgi and ER, Golgi organization, and actin cytoskeleton organization; GEA1 has a paralog, GEA2, that arose from the whole genome duplication
YPL184C	MRN1	RNA-binding protein that may be involved in translational regulation
YMR269W	TMA23	Nucleolar protein implicated in ribosome biogenesis; deletion extends chronological lifespan
YBR170C	NPL4	Substrate-recruiting cofactor of the Cdc48p-Npl4p-Ufd1p segregase; assists Cdc48p in the dislocation of misfolded, polyubiquitinated ERAD substrates that are subsequently delivered to the proteasome for degradation
YBR092C	PHO3	Constitutively expressed acid phosphatase similar to Pho5p; brought to the cell surface by transport vesicles; hydrolyzes thiamin phosphates in the periplasmic space, increasing cellular thiamin uptake; expression is repressed by thiamin
YBR098W	MMS4	Subunit of structure-specific Mms4p-Mus81p endonuclease
YPL096W	PNG1	Conserved peptide N-glycanase; required for deglycosylation of misfolded glycoproteins during proteasome-dependent degradation
YPL032C	SVL3	Protein of unknown function; mutant phenotype suggests a potential role in vacuolar function
YKL216W	URA1	Dihydroorotate dehydrogenase; catalyzes the fourth enzymatic step in the de novo biosynthesis of pyrimidines, converting dihydroorotic acid into orotic acid
YBR157C	ICS2	Protein of unknown function; null mutation does not confer any obvious defects in growth, spore germination, viability, or carbohydrate utilization
YER119C-A	YER119C-A	Dubious open reading frame
YDL215C	GDH2	NAD(+)-dependent glutamate dehydrogenase
YJR051W	OSM1	Fumarate reductase, catalyzes the reduction of fumarate to succinate
YBR162W-A	YSY6	Protein of unknown function; expression suppresses a secretory pathway mutation in E. coli; has similarity to the mammalian RAMP4 protein involved in secretion
YBR221C	PDB1	E1 beta subunit of the pyruvate dehydrogenase (PDH) complex
YIL090W	ICE2	Integral ER membrane protein with type-III transmembrane domains; required for maintenance of ER zinc homeostasis
YKR032W	YKR032W	Dubious open reading frame
YJR049C	UTR1	ATP-NADH kinase; phosphorylates both NAD and NADH; active as a hexamer; enhances the activity of ferric reductase (Fre1p); UTR1 has a paralog, YEF1, that arose from the whole genome duplication
YPL080C	YPL080C	Dubious open reading frame
YKR044W	UIP5	Protein of unknown function that interacts with Ulp1p
YJR062C	NTA1	Amidase; removes the amide group from N-terminal asparagine and glutamine residues to generate proteins with N-terminal aspartate and glutamate residues that are targets of ubiquitin-mediated degradation
YBR151W	APD1	Protein of unknown function
YOR139C	YOR139C	Dubious open reading frame
YPR166C	MRP2	Mitochondrial ribosomal protein of the small subunit
YGL057C	GEP7	Protein of unknown function
YML063W	RPS1B	Ribosomal protein 10 (rp10) of the small (40S) subunit
YBR146W	MRPS9	Mitochondrial ribosomal protein of the small subunit
YBR139W	YBR139W	Putative serine type carboxypeptidase
YCL050C	APA1	AP4A phosphorylase; bifunctional diadenosine 5',5'''-P1,P4-tetraphosphate phosphorylase and ADP sulfurylase involved in catabolism of bis(5'-nucleosidyl) tetraphosphates
YOR309C	YOR309C	Dubious open reading frame
YGL087C	MMS2	Ubiquitin-conjugating enzyme variant; involved in error-free postreplication repair
YBR189W	RPS9B	Protein component of the small (40S) ribosomal subunit
YBR185C	MBA1	Membrane-associated mitochondrial ribosome receptor
YBR159W	IFA38	Microsomal beta-keto-reductase; contains oleate response element (ORE) sequence in the promoter region
YBR120C	CBP6	Mitochondrial protein required for translation of the COB mRNA
YJR018W	YJR018W	Dubious open reading frame
YJL006C	CTK2	Beta subunit of C-terminal domain kinase I (CTDK-I); which phosphorylates both RNA pol II subunit Rpo21p to affect transcription and pre-mRNA 3' end processing, and ribosomal protein Rps2p to increase translational fidelity
YCL026C	YCL026C	Deleted ORF; does not encode a protein
YBR275C	RIF1	Protein that binds to the Rap1p C-terminus
YKR043C	SHB17	Sedoheptulose bisphosphatase involved in riboneogenesis
YDR268W	MSW1	Mitochondrial tryptophanyl-tRNA synthetase
YBR226C	YBR226C	Dubious open reading frame
YBR233W	PBP2	RNA binding protein; has similarity to mammalian heterogeneous nuclear RNP K protein, involved in the regulation of telomere position effect and telomere length; relative distribution to the nucleus increases upon DNA replication stress
YBR288C	APM3	Mu3-like subunit of the clathrin associated protein complex (AP-3)
YDR241W	BUD26	Dubious open reading frame
YBR294W	SUL1	High affinity sulfate permease of the SulP anion transporter family; sulfate uptake is mediated by specific sulfate transporters Sul1p and Sul2p, which control the concentration of endogenous activated sulfate intermediates
YGL019W	CKB1	Beta regulatory subunit of casein kinase 2 (CK2); a Ser/Thr protein kinase with roles in cell growth and proliferation
YIL035C	CKA1	Alpha catalytic subunit of casein kinase 2 (CK2); a Ser/Thr protein kinase with roles in cell growth and proliferation
YOR039W	CKB2	Beta' regulatory subunit of casein kinase 2 (CK2); a Ser/Thr protein kinase with roles in cell growth and proliferation; CK2
